# Supplementary material
Source: PubMed Central journal article supplement (PMC4150330)
Supplement: rspb20141461supp1.pdf [file rspb20141461supp1.pdf]

**Electronic Supplementary Material**

**Prediction of phylogeographic endemism in an environmentally complex biome.**

**Carnaval et al.**

**Index:**

**Supplementary Methods: pg. 2**

**Supplementary Tables: pg. 14**

**Supplementary Figs: pg. 25**

**Supplementary Dataset: pg. 29**

## **Supplementary Methods**

### **Overall Approach.**

To map phylogeographic endemism across the forest, we build a biome-wide phylogeographic synthesis, the largest to date, in which we combine new and published sequence-level data from 25 vertebrate species or species groups. More than 90% of the data (23 taxa) come from amphibians and reptiles, low-dispersal species for which the impacts of environmental change are expected to be the strongest. To ask whether phylogeographic endemism patterns can be explained by inferred shifts of the forest climate through time, we build correlative models of forest distribution at 4 kyr intervals extending through a full glacial cycle (120 kyrs) into the past, as well as at 1 kyr intervals back to the Last Glacial Maximum (LGM). Our working assumption is that forest models will be more useful for lineage endemism prediction than taxon-based models because of the potential for broader generalization afforded by focusing on habitat shifts, as opposed to shifts in individual species. However, the applicability of these habitat models will depend on how accurately they predict climate-driven shifts of the taxa occupying unique microclimates, eco-regions, or smaller climatic envelopes *within* the biome of interest. This becomes especially relevant in geographically extensive and topographically complex regions that are climatologically heterogeneous, or which host biogeographically distinct assemblages of species, or species pools. The AF is a case in point.

Previous studies attempted to model the historical stability of the AF based on an intersection of habitat models developed under current climate, climatic conditions 6 kyr before present (6 kybp), and 21 kybp [1]. Those results suggested much higher forest stability in the

north relative to the south of the AF. While multiple phylogeographic datasets showed that the Carnaval-Moritz model [1] successfully predicted patterns of genetic diversity in lowland and mid-altitude species [2-4], subsequent data from more narrowly distributed (southern) and montane species indicated long-term persistence of unique and narrowly distributed lineages in areas predicted as unstable as per the original model [5,6]. Combined with phylogeographic data from relatively widespread groups, including organisms seemingly able to tolerate colder temperatures [7-9], these results suggest that the simple AF stability model of Carnaval and Moritz [1] is unable to predict diversity and phylogeographic endemism patterns across species pools that occupy distinct climatic envelopes within the extensive (~3000 km) and topographically complex AF. We predict that such limited transferability of a generic habitat model across the entirety of the biome, particularly across sets of taxa with disparate environmental attributes and biogeographical connections, will likely be prevalent in other similarly extensive and complex natural systems. To circumvent this problem, we use ordination-based characterization and independent modeling of distinct forest climate spaces to address major discrepancies across predictive models of regional species pools and improve climate-based stability models for the AF. Our expectation is that the incorporation of subregional differences in predictive mapping of forest persistence will improve overall prediction of phylogeographic endemism and historical demography across taxa with radically different environmental correlates – in Brazil and beyond.

### **Mapping phylogeographic endemism.**

We used *Biodiverse* [10] to estimate phylogeographic endemism based on mtDNA genealogies of 25 AF tetrapod species (table S1). In this calculation, the length of each branch on the genealogy is divided equally across the grid cells in which it or its descendant lineages occur. These adjusted branch lengths are then summed for each cell. High scores therefore are allocated to regions where a large component of phylogenetic variation is restricted to a small area. Data for 13 taxa were obtained from published materials and downloaded from Genbank; mtDNA genealogies for the remaining species were generated through standard extraction, amplification and Sanger sequencing protocols (table S2). Filling a previous sampling gap, we focused on southern montane sites and mid-montane northern localities.

To estimate phylogeographic endemism, *Biodiverse* [10] requires species presence data for all grid cells in the region of study. In lieu of this information, which is unavailable, we used geo-referenced information from each taxon (dataset S1), thinned at a 5km threshold to minimize sampling bias, to generate 2.5'-resolution (4km x 4 km) models of current species distribution in MaxEnt [11]. Species model outputs were carefully checked against the reported distribution of the focal species to ensure that they provided the most accurate measure of endemism possible. Models were then converted to binary presence/absence data using a moderately conservative “equal training sensitivity & specificity” threshold [12], and upscaled to more computationally feasible grid sizes of 5'. To estimate phylogeographic endemism, we used geo-referenced haplotype data and the species-level trees to subdivide the range of each species into lineage-specific ranges. After superimposing the tree on the distribution model of each species, we drew a minimum area polygon around each well-supported lineage. If samples were lacking from

areas located in-between polygons, we used the midpoint between their adjacent borders to arbitrarily set the geographical limits of the lineages.

Given our interest in pooled phylogeographic datasets, we focused on recent evolutionary history by aggregating available within-species genetic information into a composite mtDNA phylogeny, yet removing higher-level phylogenetic information (fig. S1). This was done by incorporating only those well-supported clades identified for each species ( $> 80\%$  Maximum Likelihood Bootstrap Support). The independent history of these major mtDNA clades is broadly supported by evidence from nuclear data sets, which are available for 19 of the 25 target taxa (2 widespread, 10 in the south, 7 in the north). Analyses performed within species complexes were able to detect well-supported nuclear clades that match several, if not all, mtDNA lineages used here [7, 8, 13, unpublished data]. Private nuclear alleles, significant differences in nuclear haplotype frequencies, and cytogenetic differences detected through intra-specific studies [4, 15, unpublished data] further support the notion that these mtDNA lineages represent independently evolving organismal lineages.

Branch lengths were calculated through maximum-likelihood GTR+G distances in Geneious, ver. 5 (Biomatters). Eighty-one percent of the data sets corresponded to protein-coding mitochondrial gene sequences and were pooled in a composite phylogenetic tree without branch-length corrections. To incorporate five additional data sets consisting of 16s ribosomal DNA sequences, which are known to evolve at a different rate relative to protein-coding mtDNA, we rescaled the branch lengths of the 16S genealogies by a factor of 1.5 before combining them with the remaining data sets (as per [15]).

## **Identifying climatic spaces within the AF.**

Because phylogeographic data gathered from AF species with distinct environmental requirements (e.g. lowland vs. montane specialists) indicate that preliminary habitat models [1] were inefficient at explaining differential historical responses to climate change, we sought to identify and independently model distinct environmental envelopes occupied by the biome. For that, we used simple ordination methods to delimit unique climate spaces within the forest. First, we extracted values of mean temperature, mean precipitation, and annual temperature seasonality [16] from 14,000 random points throughout the pre-clearing extent of the forest as per Fundação Instituto Brasileiro de Geografia e Estatística [17]. We then used a Principal Component Analysis (PCA) implemented in R ver. 2.14 to examine climate variation within the forest. Because studies of humid air circulation in the AF suggest that the forest should be treated as two distinct climatological units (a northern forest characterized by rainy winters, a southern forest with rainy summers [18]), we implemented a k-means cluster analysis to our PCA plots and set the algorithm to identify two distinct climatic spaces within the biome. After noticing that the PCA-inferred climatic spaces matched the northern (lowland and mid-altitude dominated,  $PC1 < 0$ ) and the southern (cooler and more montane,  $PC1 > 0$ ) portions of the forest, in broad agreement with the circulation-based data, we performed identity and background tests [19] with 100 replicates, to test for niche similarity. Once the climatic uniqueness of these two forest spaces was verified, we proceeded to generate separate correlative models of forest distribution based on randomly extracted points from each of the two climatic regions.

To verify whether the climate-based division of the forest environmental space was biologically meaningful, we performed a separate PCA based on climatic values extracted from the locality data of all target species. If the proposed distinction of forest climatic spaces is biologically relevant, which is desirable for accurate biodiversity prediction purposes, then we expect that the detected break in forest environmental space will roughly match a turnover in species composition. Because the majority of variation in species-specific PC scores occurred along the first axis, similar to the PC analysis of the forest, we used the species PC1 scores as a guide to tentatively classify each taxon as either southern (cooler, more montane), northern (warmer, mostly lowland and mid-altitude), or widespread. Species for which the median PC1 value was greater than 0.5 were grouped together and tentatively classified as “southern”, matching the forest classification; species with median value lower than -0.5 were categorized as “northern”. The remaining taxa (median value between -0.5 and 0.5) were categorized as ‘widespread’ and used only for overall phylogeographic endemism calculations (see table S1).

### **Estimating historical climatic stability based on snapshot paleoclimate simulations.**

To estimate historical forest stability, we used MaxEnt to develop present-day models of the distribution of the entire forest, as well as of each PCA-delimited forest space. The former were developed from 1,200 sites randomly sampled from the pre-clearing extent of the forest, using points located 25 km of each other or more to avoid spatial autocorrelation. Models of the two PCA-delimited spaces were generated from 600 random points each. We then projected these models to paleoclimatic simulations dating every 1 kyr from 1 kybp to 21 kybp (the last glacial maximum), as well as every 4 kyr from 4 kybp to 120 kybp (the last interglacial),

providing a more continuous view into the past, as per recent studies [20]. Models were run with default regularization at a 2.5' spatial resolution through the 'crossvalidate' replicate option, each averaging five runs with a different 80% - 20% set of localities for training and testing, respectively. Eight WorldClim bioclimatic variables [16] were used for modeling, representing biologically relevant summaries of means and variation in temperature and precipitation: annual mean temperature, temperature seasonality, mean temperature of warmest and coldest quarters, annual precipitation, precipitation seasonality, and precipitation of wettest and driest quarters. Past climates were based on snapshot simulations covering the last 120,000 years using the Hadley Centre Climate model (HadCM3 [20, 21]). Using this circulation model [21], for which climatic reconstructions are available at small (1 or 4kyr) time intervals, we were able to provide a more continuous and dynamic view of forest shifts through time. All paleobioclimate layers are available for download at Dryad (doi:10.5061/dryad.8kc1v). We used Viterbi's algorithm [22] to combine predictions of past distributions of the forest across time intervals and estimated historical forest stability per pixel while allowing for 0 m, 5 m, and 10 m forest dispersal per year, as per published protocols [23]. Original grid files of all maps can be downloaded from Dryad (doi:10.5061/dryad.8kc1v). By comparing our results under a maximally restrictive, static refugia model (forest dispersal = 0 m per year) to more biologically plausible dynamic refugia models (forest dispersal 5 m and 10 m per year), we were able to evaluate the sensitivity of our analyses to forest dispersal ability. Forest stability values were then extracted from the entire forest space, as well as northern and southern forest climatic subsets defined through the PCA procedure. These maps are henceforth referred to as shifting refugia maps, and the stability values obtained per grid cell were used as proxies for historical potential for lineage maintenance in our predictive model.



### **Mapping present-day environmental heterogeneity.**

To evaluate how present-day climatic heterogeneity potentially restricts the distribution of our target lineages and affects endemism, we applied K-means clustering to a PCA analysis based on values of mean temperature, mean precipitation, and annual temperature seasonality from random forest localities. With this, we delimited the largest possible number of uniquely different, diagnosable climatic spaces within the forest. After multiple iterations of the PCAs, each time applying a different K value, we found the upper limit of K that allows for the recognition of the largest number of climatically discrete spaces to be 14 (fig. S3). We then calculated the area of each polygon, or uniquely recognized climatic space under contemporary conditions, and applied this value to all grid cells within each respective polygon as a proxy for contemporary lineage dispersal potential.

### **Examining the predictive power of historical and contemporary variables in predictions of phylogeographic endemism.**

To examine the relative effects of historical and present-day climate on phylogeographic endemism, we examined correlations between per grid cell values of phylogeographic endemism and 120 kyr forest stability, 21 kyr forest stability, the total area of the contemporary climatic space occupied by each cell, and net primary productivity (NPP) per cell. The NPP data ([ftp://ftp.ntsg.umt.edu/pub/MODIS/NTSG\\_Products/MOD17/MOD17A3/](ftp://ftp.ntsg.umt.edu/pub/MODIS/NTSG_Products/MOD17/MOD17A3/), U. of Montana) correspond to averages across 2000-2011 yearly NPP means estimated at a 1 km resolution [24].

For the correlation analysis, we used the software Spatial Analyses in Macroecology (SAM, [25]) to calculate correlation coefficients ( $r$ , measuring the strength and the direction of the relationship between two variables) and to test for significance after correcting for spatial autocorrelation. SAM uses Dutilleul's method [26] to estimate the effective number of degrees of freedom. Additionally, we used SAM's partial least squares regression analysis to determine coefficients of determination,  $r^2$ , and therefore understand which proportion of the variance (fluctuation) of one variable that is predictable from another variable. Specifically, we used  $r^2$  to examine the relative explanatory power of historical vs. contemporary climate in predicting phylogeographic endemism. Regressions were run on phylogeographic endemism values estimated from all species (overall phylogeographic endemism), and on estimates of southern or northern species only. Overall regression analyses were run on the 420 grid cells for which phylogeographic data were available. Independent analyses of northern and southern taxa were based on 93 and 176 points, accordingly.

## References

1. Carnaval ACOQ, Moritz CM. 2008 Historical climate change predicts current biodiversity patterns in the Brazilian Atlantic rainforest. *J Biogeogr* **35**, 1187–1201.
2. Pellegrino K, Rodrigues MT, Waite AN, Morando M, Yassuda YY, Sites JW. 2005 Phylogeography and species limits in the *Gymnodactylus darwini* complex (Gekkonidae, Squamata): genetic structure coincides with river systems in the Brazilian Atlantic forest. *Biol J Linn Soc Lond* **85**, 13–26.
3. Palma-Silva C, Lexer C, Paggi GM, Barbará T, Bered F, Bodanese-Zanettini MH. 2009 Range-wide patterns of nuclear and chloroplast DNA diversity in *Vriesea gigantea* (Bromeliaceae), a Neotropical forest species. *Heredity* **103**, 503–512.

4. Martins FM. 2011 Historical biogeography of the Brazilian Atlantic forest and the Carnaval–Moritz model of Pleistocene refugia: what do phylogeographical studies tell us? *Biol J Linn Soc Lond* **104**, 499–509.
5. Amaro RC, Yonenaga-Yassuda Y, Rodrigues MT, Carnaval AC. 2012 Demographic processes in the montane Atlantic rainforest: molecular and cytogenetic evidence from the endemic frog *Proceratophrys boiei*. *Mol Phylogenet Evol* **62**, 880–888.
6. Batalha-Filho H, Cabanne GS, Miyaki CY. 2012. Phylogeography of an Atlantic forest passerine reveals demographic stability through the last glacial maximum. *Mol Phylogenet Evol* **65**, 892–902.
7. Thomé MTC, Zamudio KR, Giovanelli JG, Haddad CF, Baldissera FA, Alexandrino J. 2010 Phylogeography of endemic toads and post-Pliocene persistence of the Brazilian Atlantic Forest. *Mol Phylogenet Evol* **55**, 1018–1031.
8. Cabanne GS, d’Horta FM, Sar EH, Santos FR, Miyaki CY. 2008 Nuclear and mitochondrial phylogeography of the Atlantic forest endemic *Xiphorhynchus fuscus* (Aves: Dendrocolaptidae): biogeography and systematics implications. *Mol Phylogenet Evol* **49**, 760–773.
9. Maldonado-Coelho M. 2012 Climatic oscillations shape the phylogeographical structure of Atlantic Forest fire-eye antbirds (Aves: Thamnophilidae). *Biol J Linn Soc Lond* **10**, 900–924.
10. Laffan SW, Lubarsky E, Rosauer DF. 2010 Biodiverse, a tool for the spatial analysis of biological and related diversity. *Ecography* **33**, 643–647.
11. Phillips SJ, Anderson RP, Schapire RE. 2006 Maximum entropy modeling of species geographic distributions. *Ecol Modell* **190**, 231–259.

12. Pearson RG, Dawson TP, Liu C. 2004 Modelling species distributions in Britain: a hierarchical integration of climate and land-cover data. *Ecography* **27**, 285–298.
13. Brunes TO, Sequeira F, Haddad CF, Alexandrino J. 2010 Gene and species trees of a Neotropical group of treefrogs: genetic diversification in the Brazilian Atlantic Forest and the origin of a polyploid species. *Mol Phylogenet Evol* **57**, 1120–1133.
14. Carnaval ACOQ, Bates JM. 2007 Amphibian DNA shows marked genetic structure and tracks Pleistocene climate change in northeastern Brazil. *Evolution* **61**, 2942–2957.
15. Jiang Z, Castoe T, Austin C, Burbrink F, Herron M, McGuire J, Parkinson C, Pollock D. 2007 Comparative mitochondrial genomics of snakes: extraordinary substitution rate dynamics and functionality of the duplicate control region. *BMC Evol Biol* **7**, 123.
16. Hijmans RJ, Cameron SE, Parra JL, Jones PG, Jarvis A. 2005 Very high resolution interpolated climate surfaces for global land areas. *International Journal of Climatology* **25**, 1965–1978.
17. Fundação Instituto Brasileiro de Geografia e Estatística. 1988 *Mapa de vegetação do Brasil*. Rio de Janeiro: Fundação Instituto Brasileiro de Geografia e Estatística.
18. Grimm AM. 2003 The El Niño Impact on the Summer Monsoon in Brazil: Regional Processes versus Remote Influences. *J Clim* **16**, 263–280.
19. Warren DL, Glor RE, Turelli M. 2010 ENMTools: a toolbox for comparative studies of environmental niche models. *Ecography* **33**, 607–611.
20. Fuchs J, Parra JL, Goodman SM, Raherilalao MJ, Vanderwal J, Bowie RC. 2013 Extending ecological niche models to the past 120 000 years corroborates the lack of strong phylogeographic structure in the crested drongo (*Dicrurus forficatus forficatus*) on Madagascar. *Biol J Linn Soc Lond* **108**, 658–676.

21. Singarayer JS, Valdes PJ. 2010 High-latitude climate sensitivity to ice-sheet forcing over the last 120 kyr. *Quat Sci Rev* **29**, 43–55.
22. Viterbi AJ. 1967 Error bounds for convolutional codes and an asymptotically optimum decoding algorithm. *IEEE Trans Inf Theor* **13**, 260–269.
23. Graham CH, VanDerWal J, Phillips S, Williams SE, Moritz C. 2010 Dynamic refugia and species persistence: tracking spatial shifts in habitat through time. *Ecography* **33**, 1062–1069.
24. Zhao M, Running SW. 2010 Drought-induced reduction in global terrestrial net primary production from 2000 through 2009. *Science* **329**, 940–943.
25. Rangel T, Diniz-Filho JAF, Bini LM. 2010 SAM: a comprehensive application for spatial analysis in macroecology. *Ecography* **33**, 46–50.
26. Dutilleul P. 1993 Modifying the t-test for assessing the correlation between 2 spatial processes. *Biometrics* **49**, 305–314.

## II. Supplementary Tables:

**Table S1.** Table of molecular datasets used in the present study, including mtDNA marker utilized, number of sequenced specimens (N), and categorization of the species range (northern, southern, or widespread) as explained in Methods. References are provided whenever DNA datasets were obtained from published GenBank records. Novel datasets are indicated by respective GenBank accession numbers.

| Species                              | Order, Family               | marker utilized | N   | Range Category | Source of mtDNA data            |
|--------------------------------------|-----------------------------|-----------------|-----|----------------|---------------------------------|
| <i>Anolis punctatus</i>              | Squamata, Polychrotidae     | ND2             | 20  | North          | KM204350 - KM204354             |
| <i>Bothrops jararaca</i>             | Squamata, Viperidae         | Cyt b           | 159 | South          | [1]                             |
| <i>Brachycephalus</i> spp. complex   | Anura, Brachycephalidae     | 16s             | 53  | South          | KM204365 - KM204369             |
| <i>Chiasmocleis carvalhoi</i>        | Anura, Microhylidae         | ND2             | 50  | North          | [2]                             |
| <i>Coleodactylus meridionalis</i>    | Squamata, Sphaerodactylidae | 16s             | 138 | North          | DQ110494.1, KM204325 - KM204333 |
| <i>Colobdactylus taunayi</i>         | Squamata, Gymnophthalmidae  | 16s             | 18  | South          | KM204372 - KM204373             |
| <i>Dendropsophus elegans</i>         | Anura, Hylidae              | ND2             | 172 | Widespread     | [2]                             |
| <i>Enyalius catenatus</i>            | Squamata, Leiosauridae      | ND4             | 161 | North          | KM204334 - KM204336             |
| <i>Gymnodactylus darwini</i>         | Squamata, Gekkonidae        | Cyt b           | 47  | North          | [3]                             |
| <i>Heterodactylus imbricatus</i>     | Squamata, Gymnophthalmidae  | 16s             | 8   | South          | KM204374 - KM204375             |
| <i>Hypsiboas albomarginatus</i>      | Squamata, Hylidae           | ND2             | 130 | North          | [4]                             |
| <i>Hypsiboas faber</i>               | Squamata, Hylidae           | ND2             | 137 | Widespread     | [4]                             |
| <i>Hypsiboas semilineatus</i>        | Squamata, Hylidae           | ND2             | 112 | North          | [4]                             |
| <i>Leposoma scincoides</i> complex   | Squamata, Gymnophthalmidae  | ND4             | 91  | North          | [5] and KM204337 - KM204344     |
| <i>Mabuya dorsivittata</i>           | Squamata, Scincidae         | Cyt b           | 25  | South          | KM204355 - KM204358             |
| <i>Melanophryniscus</i> spp. complex | Anura, Bufonidae            | 16s             | 10  | South          | KM204370 - KM204371             |

|                                         |                               |       |     |            |                     |
|-----------------------------------------|-------------------------------|-------|-----|------------|---------------------|
| <i>Phyllomedusa burmeisteri</i> complex | Anura, Hylidae                | ND2   | 35  | South      | [6]                 |
| <i>Placosoma glabellum</i>              | Squamata, Gymnophthalmidae    | ND4   | 16  | South      | KM204345 - KM204349 |
| <i>Proceratophrys boiei</i>             | Anura, Leptodactylidae        | Cyt b | 169 | South      | [7]                 |
| <i>Proceratophrys renalis</i>           | Anura, Leptodactylidae        | Cyt b | 42  | North      | [8]                 |
| <i>Pyriglena</i> complex                | Passeriformes, Thamnophilidae | ND2   | 245 | Widespread | [9]                 |
| <i>Rhinella crucifer</i> complex        | Anura, Bufonidae              | ND1   | 78  | South      | [10]                |
| <i>Vitreorana eurygnatha</i>            | Anura, Centrolenidae          | ND1   | 31  | South      | KM204320 - KM204324 |
| <i>Vitreorana uranoscopa</i>            | Anura, Centrolenidae          | ND1   | 57  | South      | KM204359 - KM204364 |
| <i>Xiphorhynchus fuscus</i>             | Passeriformes, Furnariidae    | Cyt b | 22  | Widespread | [11]                |

## References

1. Grazziotin FG, Monzel M, Echeverrigaray S, Bonato SL. 2006 Phylogeography of the *Bothrops jararaca* complex (Serpentes: Viperidae): past fragmentation and island colonization in the Brazilian Atlantic Forest. *Mol Ecol* **15**, 3969 – 3982.
2. Tonini JFR, Costa LP, Carnaval AC. 2013 Phylogeographic structure is strong in the Atlantic Forest; predictive power of correlative paleodistribution models, not always. *J Zool Syst Evol Res* **51**, 114–121.
3. Pellegrino K, Rodrigues MT, Waite AN, Morando M, Yassuda YY, Sites JW. 2005 Phylogeography and species limits in the *Gymnodactylus darwinii* complex (Gekkonidae, Squamata): Genetic structure coincides with river systems in the Brazilian Atlantic forest. *Biol J Linn Soc Lond* **85**, 13 – 26.
4. Carnaval AC, Moritz C, Hickerson M, Haddad C, Rodrigues M. 2009 Stability predicts diversity in the Brazilian Atlantic Forest hotspot. *Science* **323**, 785 – 789.
5. Pellegrino K, Rodrigues MT, James Harris D, Yonenaga-Yassuda Y, Sites JW. 2011 Molecular phylogeny, biogeography and insights into the origin of parthenogenesis in the Neotropical genus *Leposoma* (Squamata: Gymnophthalmidae): Ancient links between the Atlantic Forest and Amazonia. *Mol Phylogenet Evol* **61**, 446 – 459.
6. Brunet TO, Sequeira F, Haddad CF, Alexandrino J. 2010 Gene and species trees of a Neotropical group of treefrogs: genetic diversification in the Brazilian Atlantic Forest and the origin of a polyploid species. *Mol Phylogenet Evol* **57**, 1120 – 1133.
7. Amaro RC, Yonenaga-Yassuda Y, Rodrigues MT, Carnaval AC. 2012 Demographic processes in the montane Atlantic rainforest: molecular and cytogenetic evidence from the endemic frog *Proceratophrys boiei*. *Mol Phylogenet Evol* **62**, 880 – 888.
8. Carnaval ACOQ, Bates JM. 2007 Amphibian DNA shows marked genetic structure and tracks Pleistocene climate change in northeastern Brazil. *Evolution* **61**, 2942 – 2957.

9. Maldonado-Coelho M. 2012 Climatic oscillations shape the phylogeographical structure of Atlantic Forest fire-eye antbirds (Aves: Thamnophilidae). *Biol J Linn Soc Lond* **105**, 900 – 924.
10. Thomé MTC, Zamudio KR, Giovanelli JG, Haddad CF, Baldissera FA, Alexandrino J. 2010 Phylogeography of endemic toads and post-Pliocene persistence of the Brazilian Atlantic Forest. *Mol Phylogen Evol* **55**, 1018 – 1031.
11. Cabanne GS, Santos FR, Miyaki CY. 2007 Phylogeography of *Xiphorhynchus fuscus* (Passeriformes: Dendrocolaptidae): vicariance and recent demographic expansion in the southern Atlantic forest. *Biol J Linn Soc Lond* **91**, 73 – 84.



**Table S2.** Primers and amplification protocols utilized for newly generated data.

| Species                           | primer pair                               | PCR profile                                                                                                                                                  |
|-----------------------------------|-------------------------------------------|--------------------------------------------------------------------------------------------------------------------------------------------------------------|
| <i>Anolis punctatus</i>           | LVT_Metf.6_AnCr,<br>LVT_5617_AnCr<br>[1]. | 94°C (3 min); 35 cycles at 94°C (45 s), 60°C (45 s), and 72°C (1:30 min); 72°C (7 min).                                                                      |
| <i>Brachycephalus</i> spp.        | 16SA-L, 16SB-H [2].                       | 96°C (1 min); 35 cycles at 96°C (15s), 56°C (50s) and 60°C (4 min).                                                                                          |
| <i>Coleodactylus meridionalis</i> | 16SF, 16SR [3].                           | 94°C (5 min); 35 cycles at 94°C (40 s), 60°C (40 s), 72°C (40 s); 72°C (7 min).                                                                              |
| <i>Colobdactylus taunayi</i>      | MVZ117, MVZ 98 [4].                       | 95°C (10 min); 35 cycles at 94°C (30 s), 50°C (45 s), 72°C (1 min); 72°C (10 min).                                                                           |
| <i>Enyalius catenatus</i>         | ND4, LEU [5].                             | 95°C (3 min); 40 cycles at 95°C (25 s), 52°C (60 s), 72°C (2 min); 72°C (5 min).                                                                             |
| <i>Heterodactylus imbricatus</i>  | MVZ117, MVZ 98 [4].                       | 95°C (10 min); 35 cycles at 94°C (30 s), 50°C (45 s), 72°C (1 min); 72°C (10 min).                                                                           |
| <i>Leposoma scincoides</i>        | ND4, LEU [5].                             | 95°C (3 min); 35 cycles at 95°C (30 s), 52°C (30 s), 72°C (30s); 72°C (5 min).                                                                               |
| <i>Mabuya dorsivittata</i>        | L15146, H15915sh [6].                     | 94°C (3 min); 35 cycles at 94°C (45 s), 53°C (45 s), 72°C (1:30 min); 72°C (7 min).                                                                          |
| <i>Melanophryniscus</i>           | 16SA-L, 16SB-H [2].                       | 96°C (1 min); 35 cycles at 96°C (15s), 56°C (50s) and 60°C (4 min).                                                                                          |
| <i>Placosoma glabellum</i>        | ND4F, ND4R [7].                           | 94°C (3 min); 37 cycles at 94°C (45 s), 48°C (45 s), 72°C (1 min); 72°C (7 min).                                                                             |
| <i>Vitreorana eurygnatha</i>      | 16S-frog, tMet-frog [8].                  | 95°C (2 min); 6 cycles at 95°C (30 s), 56-50°C (-1.0°C /cycle, 30 s), 72°C (1:45 min); 30 cycles at 95°C (30 s), 52°C (30 s), 72°C (1:45 min); 72°C (5 min). |
| <i>Vitreorana uranoscopa</i>      | 16S-frog, tMet-frog [8].                  | 95°C (2 min); 6 cycles at 95°C (30 s), 56-50°C (-1.0°C /cycle, 30 s), 72°C (1:45 min); 30 cycles at 95°C (30 s), 52°C (30 s), 72°C (1:45 min); 72°C (5 min). |

## References

1. Jezkova T, Leal M, Rodriguez-Robles JA. 2009 Living together but remaining apart: comparative phylogeography of *Anolis poncensis* and *A. cooki*, two lizards endemic to the aridlands of Puerto Rico. *Biol J Linn Soc Lond* **96**, 617 – 634.
2. Vences M, Kosuch J, Lötters S, Widmer A, Jungfer KH, Köhler J, Veith M. 2000 Phylogeny and classification of poison frogs (Amphibia: Dendrobatidae), based on mitochondrial 16S and 12S ribosomal RNA gene sequences. *Mol Phylogenet Evol* **15**, 34 – 40.
3. Whiting AS, Bauer AM, Sites JW. 2003 Phylogenetic relationships and limb loss in sub-Saharan African scincine lizards (Squamata: Scincidae). *Mol Phylogenet Evol* **29**, 582 – 598.
4. Leite YLR, Patton JL. 2002 Evolution of South American spiny rats (Rodentia, Echimyidae): the star phylogeny hypothesis revisited. *Mol Phylogenet Evol* **25**, 455 – 464.
5. Arévalo E, Davis SK, Sites JW. 1994 Mitochondrial DNA sequence divergence and phylogenetic relationships among eight chromosome races of the *Sceloporus grammicus* complex (Phrynosomatidae) in central Mexico. *Syst Biol* **43**, 387 – 418.
6. Irwin DM, Kocher TD, Wilson AC. 1991 Evolution of the cytochrome b gene of Mammals. *J Mol Evol* **32**, 128 – 144.
7. Pellegrino K, Rodrigues MT, Yonegaga-Yassuda Y, Sites JW. 2001 A molecular perspective on the evolution of microteiid lizards (Squamata, Gymnophthalmidae), and a new classification for the family. *Biol J Linn Soc Lond* **74**, 315 – 338.
8. Wiens JJ, Fetzner JW, Parkinson CL, Reeder TW. 2005 Hylid frog phylogeny and sampling strategies for speciose clades. *Syst Biol* **54**, 719 – 748.

**Table S3.** Spatially-corrected correlation analyses between phylogeographic endemism and their potential contemporary and historical determinants. Present-day variables include the geographic extent (area) of unique contemporary climatic spaces (as proxy for present-day range restriction), and net primary productivity (NPP). Historical determinants correspond to forest stability over the last 21 and 120 kyr (as proxies for lineage maintenance through time), using zero and non-zero dispersal distances for the forest (5m forest dispersal/year, and 10m forest dispersal/ year, respectively). Correlations are examined across A) the entire Atlantic Forest, B) the northern climatic space of the forest, and C) the southern climatic space of the forest. Correlation coefficients (r) are provided for each comparison, alongside corrected p-values.

| response variable                                                           | predictor variables                      | 0m dispersal  |              | 5m dispersal  |              | 10m dispersal |              |
|-----------------------------------------------------------------------------|------------------------------------------|---------------|--------------|---------------|--------------|---------------|--------------|
|                                                                             |                                          | R             | corrected p  | R             | corrected p  | R             | corrected p  |
| overall phylogeographic endemism (Atlantic forest-wide, all species pooled) | <b>area</b>                              | <b>-0.243</b> | <b>0.033</b> | <b>-0.243</b> | <b>0.033</b> | <b>-0.243</b> | <b>0.033</b> |
|                                                                             | <b>npp</b>                               | <b>0.415</b>  | <b>0.001</b> | <b>0.415</b>  | <b>0.001</b> | <b>0.415</b>  | <b>0.001</b> |
|                                                                             | <b>120k stability of entire forest</b>   | <b>0.387</b>  | <b>0.007</b> | <b>0.562</b>  | <b>0.002</b> | <b>0.571</b>  | <b>0.003</b> |
|                                                                             | <b>21k stability of entire forest</b>    | <b>0.265</b>  | <b>0.033</b> | <b>0.262</b>  | <b>0.031</b> | <b>0.327</b>  | <b>0.017</b> |
| phylogeographic endemism, northern species only                             | area                                     | 0.097         | 0.595        | 0.097         | 0.595        | 0.097         | 0.595        |
|                                                                             | npp                                      | 0.076         | 0.670        | 0.076         | 0.670        | 0.076         | 0.670        |
|                                                                             | <b>120k stability of northern forest</b> | <b>0.677</b>  | <b>0.019</b> | 0.700         | 0.117        | 0.670         | 0.171        |
|                                                                             | <b>21k stability of northern forest</b>  | <b>0.642</b>  | <b>0.040</b> | 0.640         | 0.064        | 0.657         | 0.096        |
| phylogeographic endemism, southern species only                             | <b>area</b>                              | <b>-0.397</b> | <b>0.01</b>  | <b>-0.397</b> | <b>0.01</b>  | <b>-0.397</b> | <b>0.01</b>  |
|                                                                             | <b>npp</b>                               | <b>0.467</b>  | <b>0.001</b> | <b>0.467</b>  | <b>0.001</b> | <b>0.467</b>  | <b>0.001</b> |
|                                                                             | 120k stability of southern forest        | 0.069         | 0.733        | 0.244         | 0.257        | 0.077         | 0.759        |
|                                                                             | 21k stability of southern forest         | -0.001        | 0.995        | <0.001        | 1.000        | 0.146         | 0.492        |

**Table S4.** Partial Least Squares Regressions<sup>1</sup> of phylogeographic endemism against potential contemporary<sup>2</sup> and historical<sup>3</sup> predictor variables. Regressions are examined across A) the entire Atlantic Forest, B) the northern climatic space of the forest, and C) the southern climatic space of the forest.

| response variable                                                     | predictor variables                                | r <sup>2</sup>              | AIC weights  | predictor variables   | r <sup>2</sup>        | AIC weights  |       |
|-----------------------------------------------------------------------|----------------------------------------------------|-----------------------------|--------------|-----------------------|-----------------------|--------------|-------|
| A. overall phylogeographic endemism (forest-wide, all species pooled) | <b>120k stability + area + NPP</b>                 | <b>0.303</b>                | <b>0.706</b> |                       |                       |              |       |
|                                                                       | 120k stability                                     | 0.150                       | <0.001       | 120k stability + area | 0.208                 | <0.001       |       |
|                                                                       | area                                               | 0.059                       | <0.001       | 120k stability + NPP  | 0.295                 | 0.294        |       |
|                                                                       | NPP                                                | 0.172                       | <0.001       | area + NPP            | 0.178                 | <0.001       |       |
|                                                                       | <b>21k stability + area + NPP</b>                  | <b>0.258</b>                | <b>0.757</b> |                       |                       |              |       |
|                                                                       | 21k stability                                      | 0.070                       | <0.001       | 21k stability + area  | 0.141                 | <0.001       |       |
|                                                                       | area                                               | 0.059                       | <0.001       | 21k stability + NPP   | 0.248                 | 0.243        |       |
|                                                                       | NPP                                                | 0.172                       | <0.001       | area + NPP            | 0.178                 | <0.001       |       |
|                                                                       | B. phylogeographic endemism, northern species only | 120k stability + area + NPP | 0.468        | 0.133                 |                       |              |       |
|                                                                       |                                                    | <b>120k stability</b>       | <b>0.458</b> | <b>0.459</b>          | 120k stability + area | 0.459        | 0.173 |
| area                                                                  |                                                    | 0.009                       | <0.001       | 120k stability + NPP  | 0.462                 | 0.236        |       |
| NPP                                                                   |                                                    | 0.006                       | <0.001       | area + NPP            | 0.029                 | <0.001       |       |
| 21k stability + area + NPP                                            |                                                    | 0.415                       | 0.080        |                       |                       |              |       |
| <b>21k stability</b>                                                  |                                                    | <b>0.412</b>                | <b>0.528</b> | 21k stability + area  | 0.414                 | 0.211        |       |
| area                                                                  |                                                    | 0.009                       | <0.001       | 21k stability + NPP   | 0.412                 | 0.181        |       |
| NPP                                                                   |                                                    | 0.006                       | <0.001       | area + NPP            | 0.029                 | <0.001       |       |
| C. phylogeographic endemism, southern species only                    | 120k stability + area + NPP                        | 0.264                       | 0.261        |                       |                       |              |       |
|                                                                       | 120k stability                                     | 0.005                       | <0.001       | 120k stability + area | 0.162                 | <0.001       |       |
|                                                                       | area                                               | 0.157                       | <0.001       | 120k stability + NPP  | 0.218                 | <0.001       |       |
|                                                                       | NPP                                                | 0.218                       | 0.002        | <b>area + NPP</b>     | <b>0.264</b>          | <b>0.736</b> |       |
|                                                                       | 21k stability + area + NPP                         | 0.267                       | 0.343        |                       |                       |              |       |
|                                                                       | 21k stability                                      | <0.001                      | <0.001       | 21k stability + area  | 0.158                 | <0.001       |       |
|                                                                       | area                                               | 0.157                       | <0.001       | 21k stability + NPP   | 0.221                 | 0.001        |       |
|                                                                       | NPP                                                | 0.218                       | 0.002        | <b>area + NPP</b>     | <b>0.264</b>          | <b>0.654</b> |       |

1. Coefficients of determination ( $r^2$ ) are provided alongside corrected AIC weights, which indicate the relative importance of forest stability, current climate, and combined stability and current climate as predictors of phylogeographic endemism. Variables with highest predictive power in bold.
2. Present-day variables include the geographic extent (area) of unique contemporary climatic spaces (as proxy for present-day range restriction), and net primary productivity (NPP).
3. Historical predictors correspond to forest stability over the last 21 and 120 kyr (as proxies for lineage maintenance through time).

**Table S5.** Partial Least Squares Regressions of phylogeographic endemism against potential contemporary and historical predictor variables. Present-day variables include the geographic extent (area) of unique contemporary climatic spaces (as proxy for present-day range restriction), and net primary productivity (NPP). Historical predictors correspond to forest stability over the last 21 and 120 kyr (as proxies for lineage maintenance through time), estimated under an assumption of non-zero dispersal distances for the forest (5m forest dispersal/year, and 10m forest dispersal/ year, respectively). Regressions are examined across A) the entire Atlantic Forest, B) the northern climatic space of the forest, and C) the southern climatic space of the forest. Coefficients of determination ( $r^2$ ) are provided alongside corrected AIC weights, which indicate the relative importance of forest stability, current climate, and combined stability and current climate as predictors of phylogeographic endemism. Most predictive variables in bold.

| response variable                                                              | 5m forest dispersal per year                       |                             |              |                             |                       |              |       |
|--------------------------------------------------------------------------------|----------------------------------------------------|-----------------------------|--------------|-----------------------------|-----------------------|--------------|-------|
|                                                                                | predictor variables                                | $r^2$                       | AIC weight   | predictor variables         | $r^2$                 | AIC weight   |       |
| A. overall phylogeographic endemism (Atlantic forest-wide, all species pooled) | <b>120k stability + area + NPP</b>                 | <b>0.402</b>                | <b>0.759</b> |                             |                       |              |       |
|                                                                                | 120k stability                                     | 0.316                       | <0.001       | 120k stability + area       | 0.354                 | <0.001       |       |
|                                                                                | area                                               | 0.059                       | <0.001       | 120k stability + NPP        | 0.394                 | 0.241        |       |
|                                                                                | NPP                                                | 0.172                       | <0.001       | area + NPP                  | 0.178                 | <0.001       |       |
|                                                                                | <b>21k stability + area + NPP</b>                  | <b>0.255</b>                | <b>0.748</b> |                             |                       |              |       |
|                                                                                | 21k stability                                      | 0.068                       | <0.001       | 21k stability + area        | 0.138                 | <0.001       |       |
|                                                                                | area                                               | 0.059                       | <0.001       | 21k stability + NPP         | 0.245                 | 0.252        |       |
|                                                                                | NPP                                                | 0.172                       | <0.001       | area + NPP                  | 0.178                 | <0.001       |       |
|                                                                                | B. phylogeographic endemism, northern species only | 120k stability + area + NPP | 0.505        | 0.146                       |                       |              |       |
|                                                                                |                                                    | 120k stability              | 0.490        | 0.263                       | 120k stability + area | 0.497        | 0.185 |
| area                                                                           |                                                    | 0.009                       | <0.001       | <b>120k stability + NPP</b> | <b>0.505</b>          | <b>0.407</b> |       |
| NPP                                                                            |                                                    | 0.006                       | <0.001       | area + NPP                  | 0.029                 | <0.001       |       |
| 21k stability + area + NPP                                                     |                                                    | 0.414                       | 0.081        |                             |                       |              |       |
| <b>21k stability</b>                                                           |                                                    | <b>0.410</b>                | <b>0.525</b> | 21k stability + area        | 0.412                 | 0.214        |       |
| area                                                                           |                                                    | 0.009                       | <0.001       | 21k stability + NPP         | 0.410                 | 0.080        |       |
| NPP                                                                            |                                                    | 0.006                       | <0.001       | area + NPP                  | 0.029                 | <0.001       |       |
| 120k stability + area + NPP                                                    |                                                    | 0.268                       | 0.399        |                             |                       |              |       |

|                                                          |                            |        |        |                       |              |              |
|----------------------------------------------------------|----------------------------|--------|--------|-----------------------|--------------|--------------|
| c. Phylogeographic<br>endemism, southern<br>species only | 120k stability             | 0.060  | <0.001 | 120k stability + area | 0.180        | <0.001       |
|                                                          | area                       | 0.157  | <0.001 | 120k stability + NPP  | 0.226        | 0.002        |
|                                                          | NPP                        | 0.218  | 0.002  | <b>area + NPP</b>     | <b>0.264</b> | <b>0.597</b> |
|                                                          | 21k stability + area + NPP | 0.267  | 0.353  |                       |              |              |
|                                                          | 21k stability              | <0.001 | <0.001 | 21k stability + area  | 0.158        | <0.001       |
|                                                          | area                       | 0.157  | <0.001 | 21k stability + NPP   | 0.221        | 0.001        |
|                                                          | NPP                        | 0.218  | 0.002  | <b>area + NPP</b>     | <b>0.264</b> | <b>0.644</b> |

| 10m forest dispersal per year                                                              |                                    |                |                     |                             |                |              |
|--------------------------------------------------------------------------------------------|------------------------------------|----------------|---------------------|-----------------------------|----------------|--------------|
| response variable                                                                          | predictor variables                | r <sup>2</sup> | AIC weight          | Predictor variables         | r <sup>2</sup> | AIC weight   |
| A. overall<br>phylogeographic<br>endemism (Atlantic<br>forest-wide, all<br>species pooled) | <b>120k stability + area + NPP</b> | <b>0.391</b>   | <b>0.518</b>        |                             |                |              |
|                                                                                            | 120k stability                     | 0.326          | <0.001              | 120k stability + area       | 0.350          | <0.001       |
|                                                                                            | area                               | 0.059          | <0.001              | 120k stability + NPP        | 0.387          | 0.482        |
|                                                                                            | NPP                                | 0.172          | <0.001              | area + NPP                  | 0.178          | <0.001       |
|                                                                                            | <b>21k stability + area + NPP</b>  | <b>0.298</b>   | <b>0.818</b>        |                             |                |              |
|                                                                                            | 21k stability                      | 0.107          | <0.001              | 21k stability + area        | 0.181          | <0.001       |
|                                                                                            | area                               | 0.059          | <0.001              | 21k stability + NPP         | 0.287          | 0.182        |
| B. phylogeographic<br>endemism, northern<br>species only                                   | NPP                                | 0.172          | <0.001              | area + NPP                  | 0.178          | <0.001       |
|                                                                                            | 120k stability + area + NPP        | 0.485          | 0.133               |                             |                |              |
|                                                                                            | 120k stability                     | 0.449          | 0.271               | 120k stability + area       | 0.472          | 0.214        |
|                                                                                            | area                               | 0.009          | 0.067               | <b>120k stability + NPP</b> | <b>0.479</b>   | <b>0.447</b> |
|                                                                                            | NPP                                | 0.006          | <0.001              | area + NPP                  | 0.029          | <0.001       |
|                                                                                            | 21k stability + area + NPP         | 0.433          | 0.068               |                             |                |              |
|                                                                                            | <b>21k stability</b>               | <b>0.432</b>   | <b>0.543</b>        | 21k stability + area        | 0.433          | 0.204        |
| area                                                                                       | 0.009                              | <0.001         | 21k stability + NPP | 0.432                       | 0.185          |              |
| NPP                                                                                        | 0.006                              | <0.001         | area + NPP          | 0.029                       | <0.001         |              |

|                                                          |                                       |              |              |                       |              |              |
|----------------------------------------------------------|---------------------------------------|--------------|--------------|-----------------------|--------------|--------------|
|                                                          | <b>120k stability + area + NPP</b>    | <b>0.273</b> | <b>0.568</b> |                       |              |              |
|                                                          | 120k stability                        | 0.006        | <0.001       | 120k stability + area | 0.158        | <0.001       |
|                                                          | area                                  | 0.157        | <0.001       | 120k stability + NPP  | 0.222        | <0.001       |
|                                                          | NPP                                   | 0.218        | 0.001        | area + NPP            | 0.264        | 0.430        |
|                                                          | 21k stability + current climate + NPP | 0.264        | 0.261        |                       |              |              |
|                                                          | 21k stability                         | <0.001       | 0.021        | 21k stability + area  | 0.163        | <0.001       |
|                                                          | area                                  | 0.157        | <0.001       | 21k stability + NPP   | 0.216        | <0.001       |
| C. phylogeographic<br>endemism, southern<br>species only | NPP                                   | 0.218        | 0.002        | <b>area + NPP</b>     | <b>0.264</b> | <b>0.736</b> |





**Fig. S2.** Dynamic forest refuge models over the last 21 kyr (above) and 120 kyr (below), assuming low (5m/year, left) and medium (10m/year, right) forest dispersal. Within each dispersal treatment, the left panel depicts predictions of forest stability when the AF is modeled as a whole. Central and right panels portray predictions of forest stability of the northern and southern climatic spaces, respectively. Suitability values represent the sum of negative log probabilities.

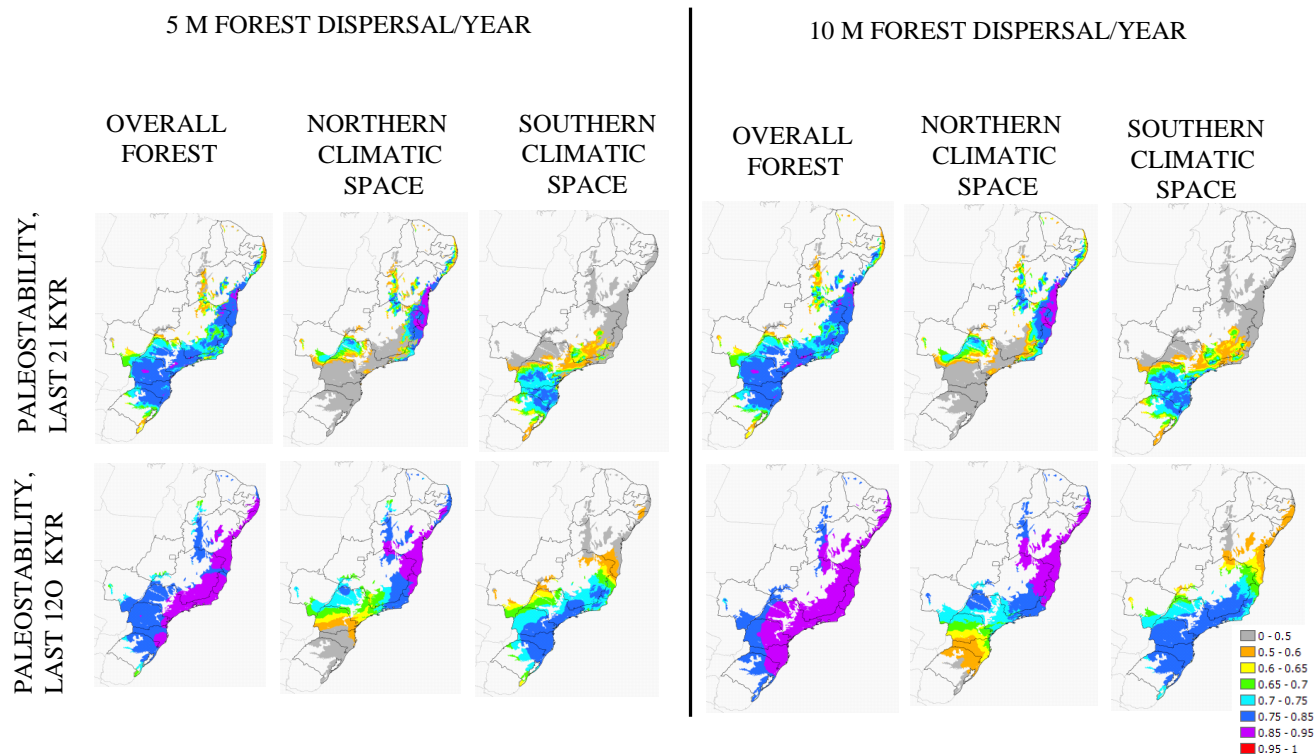

**Fig. S3.** Discrete climatic spaces within the Atlantic Forest under present-day climates given K-clustering analysis ( $K = 14$ ). Boundaries delineate the northern (black) and southern (red) climatic spaces of the forest.

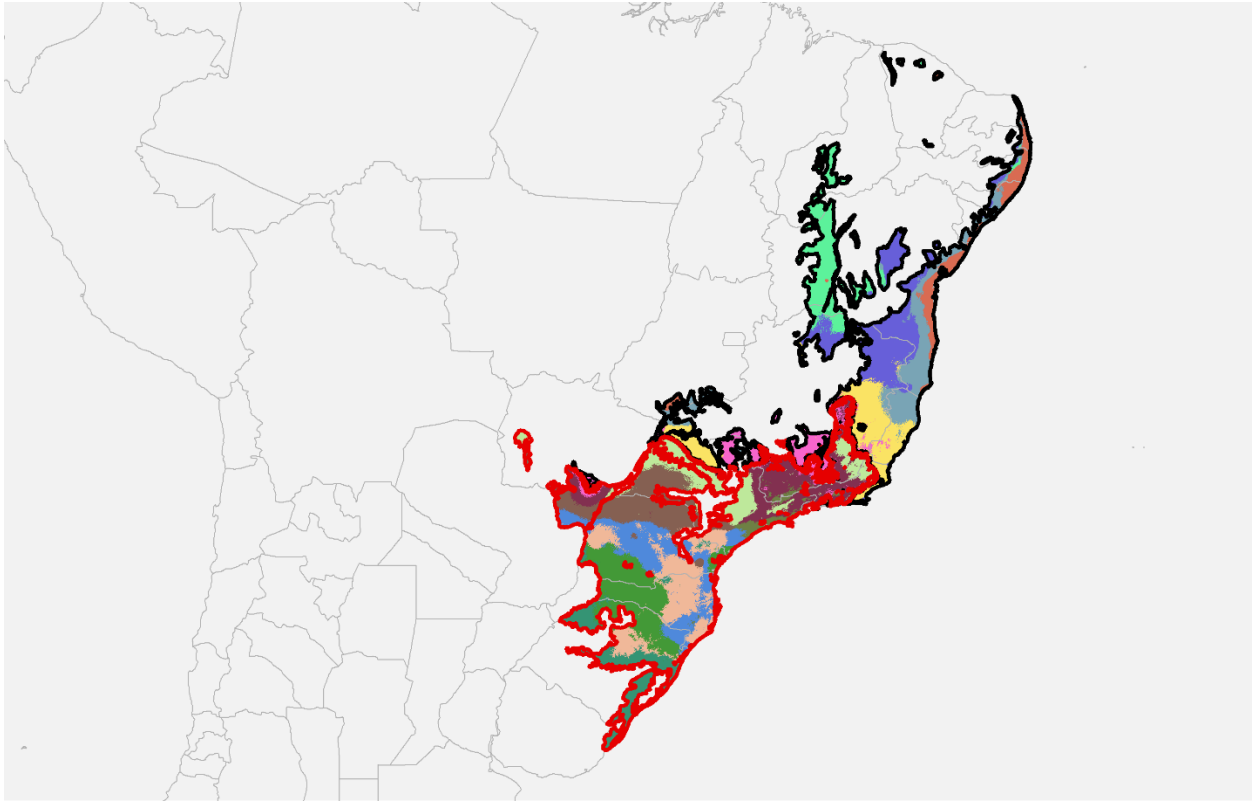

**Fig. S4.** Phylogeographic endemism vs. 120 kyr and 21 kyr forest stability values (proxy for historical lineage persistence) for three different forest dispersal scenarios (0m/yr, 5m/yr & 10m/yr; left panel) and inferred area of current climatic envelopes (proxy for current range restriction; right panel). Red triangles depict sites in the northern forests, black circles denote southern forest spaces.

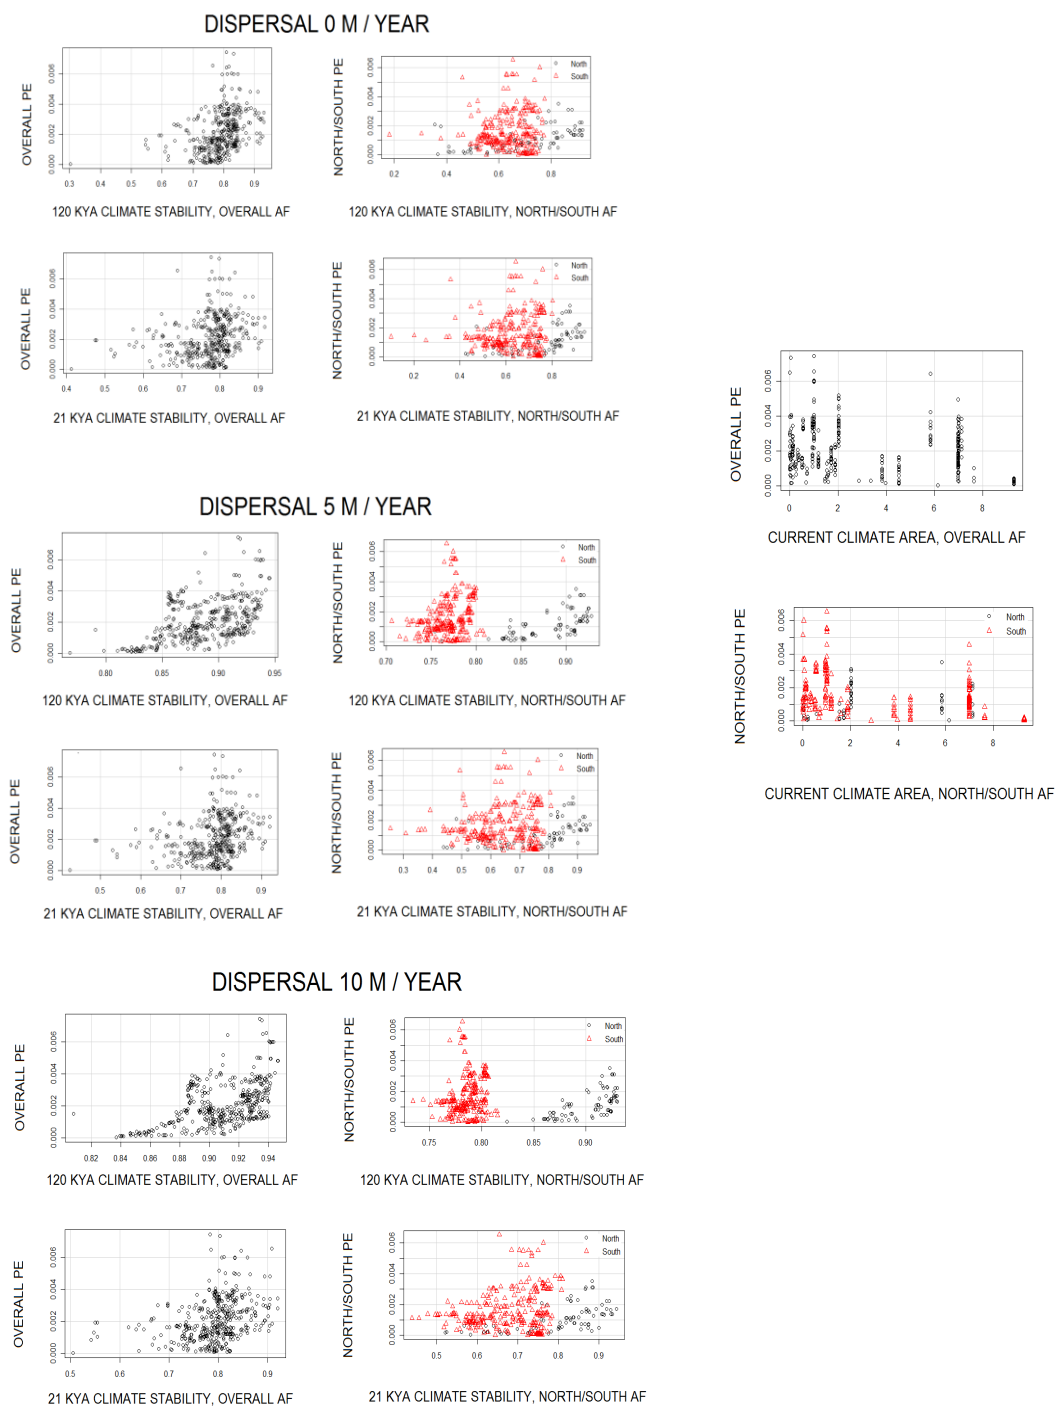

**Supplementary Dataset:**

**Dataset S1.** Locality data utilized to build correlative models of species distribution for all target taxa. Species names are in alphabetical order, followed by longitude and latitude.

|                   |          |          |
|-------------------|----------|----------|
| Anolis punctatus  | -39.0333 | -14.8167 |
| Anolis punctatus  | -39.5167 | -15.1500 |
| Anolis punctatus  | -39.5192 | -15.4445 |
| Anolis punctatus  | -40.0650 | -19.1516 |
| Anolis punctatus  | -40.0714 | -19.4344 |
| Anolis punctatus  | -40.5219 | -20.2811 |
| Anolis punctatus  | -41.7114 | -20.9803 |
| Anolis punctatus  | -42.5254 | -19.6844 |
| Anolis punctatus  | -42.6611 | -22.4506 |
| Anolis punctatus  | -43.2347 | -22.9392 |
| Anolis punctatus  | -43.3316 | -20.3292 |
| Anolis punctatus  | -43.5833 | -22.4000 |
| Anolis punctatus  | -46.0033 | -23.7839 |
| Bothrops jararaca | -40.3069 | -20.3058 |
| Bothrops jararaca | -40.5822 | -19.9364 |
| Bothrops jararaca | -40.6681 | -20.3664 |
| Bothrops jararaca | -40.7333 | -20.0333 |
| Bothrops jararaca | -41.8833 | -22.7511 |
| Bothrops jararaca | -42.0272 | -21.9581 |
| Bothrops jararaca | -42.1492 | -20.3842 |
| Bothrops jararaca | -42.2667 | -20.7994 |
| Bothrops jararaca | -42.2678 | -20.1672 |
| Bothrops jararaca | -42.2844 | -21.5500 |
| Bothrops jararaca | -42.3636 | -22.0350 |
| Bothrops jararaca | -42.5275 | -22.2636 |
| Bothrops jararaca | -42.6525 | -22.4872 |
| Bothrops jararaca | -42.8181 | -22.9164 |
| Bothrops jararaca | -42.9178 | -22.0075 |
| Bothrops jararaca | -42.9750 | -22.4158 |
| Bothrops jararaca | -43.0397 | -22.6606 |
| Bothrops jararaca | -43.0728 | -22.8353 |
| Bothrops jararaca | -43.1567 | -19.8358 |
| Bothrops jararaca | -43.1856 | -22.5203 |
| Bothrops jararaca | -43.2081 | -22.1158 |
| Bothrops jararaca | -43.2925 | -22.1603 |
| Bothrops jararaca | -43.3553 | -21.7531 |
| Bothrops jararaca | -43.4108 | -19.9728 |

|                   |          |          |
|-------------------|----------|----------|
| Bothrops jararaca | -43.4847 | -20.8492 |
| Bothrops jararaca | -43.6678 | -22.4103 |
| Bothrops jararaca | -43.6828 | -22.5528 |
| Bothrops jararaca | -43.6842 | -20.7831 |
| Bothrops jararaca | -43.7044 | -22.2456 |
| Bothrops jararaca | -43.8253 | -22.4711 |
| Bothrops jararaca | -44.4017 | -22.1672 |
| Bothrops jararaca | -45.0761 | -23.4525 |
| Bothrops jararaca | -45.4508 | -22.7994 |
| Bothrops jararaca | -45.9664 | -19.2172 |
| Bothrops jararaca | -46.5133 | -18.5892 |
| Bothrops jararaca | -46.5442 | -23.7125 |
| Bothrops jararaca | -46.5569 | -23.1239 |
| Bothrops jararaca | -46.6283 | -23.5336 |
| Bothrops jararaca | -46.6842 | -22.6653 |
| Bothrops jararaca | -46.7467 | -23.4131 |
| Bothrops jararaca | -46.7689 | -23.6031 |
| Bothrops jararaca | -46.8033 | -23.5197 |
| Bothrops jararaca | -46.8733 | -23.1994 |
| Bothrops jararaca | -46.9181 | -23.4497 |
| Bothrops jararaca | -46.9911 | -22.9742 |
| Bothrops jararaca | -47.0333 | -23.6825 |
| Bothrops jararaca | -47.0511 | -23.9500 |
| Bothrops jararaca | -47.0692 | -23.4333 |
| Bothrops jararaca | -47.2183 | -23.6506 |
| Bothrops jararaca | -47.4114 | -23.7122 |
| Bothrops jararaca | -47.4831 | -23.9514 |
| Bothrops jararaca | -47.5206 | -23.2119 |
| Bothrops jararaca | -48.5378 | -24.1867 |
| Bothrops jararaca | -49.0647 | -25.4525 |
| Bothrops jararaca | -49.0967 | -26.9181 |
| Bothrops jararaca | -49.0972 | -26.4836 |
| Bothrops jararaca | -49.1739 | -26.7544 |
| Bothrops jararaca | -49.1789 | -25.5775 |
| Bothrops jararaca | -49.2203 | -26.4464 |
| Bothrops jararaca | -49.2842 | -25.4306 |
| Bothrops jararaca | -49.4100 | -26.2183 |
| Bothrops jararaca | -49.7172 | -23.0333 |
| Bothrops jararaca | -49.7311 | -25.7647 |
| Bothrops jararaca | -49.7333 | -23.1678 |
| Bothrops jararaca | -49.8492 | -29.3497 |

|                   |          |          |
|-------------------|----------|----------|
| Bothrops jararaca | -49.8625 | -28.8214 |
| Bothrops jararaca | -50.0594 | -27.0556 |
| Bothrops jararaca | -50.0683 | -29.5833 |
| Bothrops jararaca | -50.3939 | -26.1811 |
| Bothrops jararaca | -50.4008 | -28.6994 |
| Bothrops jararaca | -50.5792 | -29.4431 |
| Bothrops jararaca | -50.6172 | -24.3375 |
| Bothrops jararaca | -50.6547 | -28.9331 |
| Bothrops jararaca | -50.7939 | -29.5792 |
| Bothrops jararaca | -50.8094 | -29.3633 |
| Bothrops jararaca | -51.0675 | -26.2333 |
| Bothrops jararaca | -51.0836 | -29.5325 |
| Bothrops jararaca | -51.2169 | -30.0397 |
| Bothrops jararaca | -51.5167 | -29.4511 |
| Bothrops jararaca | -51.5486 | -28.9386 |
| Bothrops jararaca | -51.6014 | -28.7844 |
| Bothrops jararaca | -51.6169 | -27.1167 |
| Bothrops jararaca | -51.6647 | -23.2394 |
| Bothrops jararaca | -51.6667 | -27.5736 |
| Bothrops jararaca | -51.8025 | -27.4197 |
| Bothrops jararaca | -52.0183 | -28.9839 |
| Bothrops jararaca | -53.4522 | -24.9672 |
| Bothrops jararaca | -53.8961 | -30.0394 |
| Bothrops jararaca | -54.4497 | -27.6506 |
| Brachycephalus    | -48.6256 | -24.3925 |
| Brachycephalus    | -48.6907 | -25.6248 |
| Brachycephalus    | -48.8378 | -25.2664 |
| Brachycephalus    | -48.8561 | -25.6111 |
| Brachycephalus    | -48.9086 | -25.3408 |
| Brachycephalus    | -48.9164 | -25.4508 |
| Brachycephalus    | -48.9236 | -26.0058 |
| Brachycephalus    | -48.9303 | -26.7997 |
| Brachycephalus    | -48.9580 | -26.2122 |
| Brachycephalus    | -48.9821 | -25.5153 |
| Brachycephalus    | -48.9957 | -25.9016 |
| Brachycephalus    | -49.0042 | -25.3886 |
| Brachycephalus    | -49.0533 | -26.2331 |
| Brachycephalus    | -49.0622 | -26.1142 |
| Brachycephalus    | -49.6701 | -25.5162 |
| BrachycephalusB   | -41.0100 | -20.4733 |
| BrachycephalusB   | -41.1142 | -20.5281 |

|                            |          |          |
|----------------------------|----------|----------|
| BrachycephalusB            | -42.2972 | -22.3603 |
| BrachycephalusB            | -43.0011 | -22.4511 |
| BrachycephalusB            | -43.2439 | -22.4731 |
| BrachycephalusB            | -43.4433 | -22.9322 |
| BrachycephalusB            | -43.6050 | -22.4864 |
| BrachycephalusB            | -44.1922 | -22.8336 |
| BrachycephalusB            | -44.6094 | -22.4564 |
| BrachycephalusB            | -44.7803 | -23.3119 |
| BrachycephalusB            | -44.7886 | -23.1772 |
| BrachycephalusB            | -45.0736 | -23.3917 |
| BrachycephalusB            | -45.1375 | -23.3444 |
| BrachycephalusB            | -45.1969 | -23.4556 |
| BrachycephalusB            | -45.3486 | -23.8719 |
| BrachycephalusB            | -45.5278 | -22.8656 |
| BrachycephalusB            | -45.8667 | -23.6333 |
| BrachycephalusB            | -45.9678 | -22.8956 |
| BrachycephalusB            | -46.5167 | -23.1819 |
| BrachycephalusB            | -46.6364 | -23.4536 |
| BrachycephalusB            | -46.6458 | -23.7864 |
| BrachycephalusB            | -46.8169 | -22.8983 |
| BrachycephalusB            | -46.9433 | -22.2367 |
| BrachycephalusB            | -46.9728 | -23.7022 |
| Chiasmocleis carvalhoi     | -39.1247 | -16.5366 |
| Chiasmocleis carvalhoi     | -39.8442 | -18.3553 |
| Chiasmocleis carvalhoi     | -39.9928 | -19.1606 |
| Chiasmocleis carvalhoi     | -40.1833 | -20.1025 |
| Chiasmocleis carvalhoi     | -40.5219 | -20.2811 |
| Chiasmocleis carvalhoi     | -41.0194 | -20.9823 |
| Chiasmocleis carvalhoi     | -41.2814 | -21.2100 |
| Chiasmocleis carvalhoi     | -42.7641 | -22.4457 |
| Chiasmocleis carvalhoi     | -43.2385 | -22.5994 |
| Chiasmocleis carvalhoi     | -44.8333 | -23.3667 |
| Coleodactylus meridionalis | -34.8500 | -7.7500  |
| Coleodactylus meridionalis | -34.8670 | -7.1170  |
| Coleodactylus meridionalis | -35.0749 | -7.8706  |
| Coleodactylus meridionalis | -35.1417 | -8.6680  |
| Coleodactylus meridionalis | -35.1792 | -6.7209  |
| Coleodactylus meridionalis | -35.2223 | -5.7221  |
| Coleodactylus meridionalis | -35.3300 | -7.6670  |
| Coleodactylus meridionalis | -35.3359 | -7.5043  |
| Coleodactylus meridionalis | -35.3840 | -7.2520  |



|                            |          |          |
|----------------------------|----------|----------|
| Coleodactylus meridionalis | -35.4830 | -9.2330  |
| Coleodactylus meridionalis | -35.5170 | -8.7000  |
| Coleodactylus meridionalis | -35.7038 | -6.9675  |
| Coleodactylus meridionalis | -35.8039 | -9.5656  |
| Coleodactylus meridionalis | -35.9303 | -9.2639  |
| Coleodactylus meridionalis | -35.9550 | -9.5800  |
| Coleodactylus meridionalis | -35.9639 | -8.2883  |
| Coleodactylus meridionalis | -36.0830 | -9.7830  |
| Coleodactylus meridionalis | -36.9072 | -10.6510 |
| Coleodactylus meridionalis | -37.5181 | -11.5201 |
| Coleodactylus meridionalis | -37.5314 | -11.3155 |
| Coleodactylus meridionalis | -37.7670 | -9.6450  |
| Coleodactylus meridionalis | -38.0062 | -12.5691 |
| Coleodactylus meridionalis | -38.0333 | -8.6330  |
| Coleodactylus meridionalis | -38.1290 | -12.6370 |
| Coleodactylus meridionalis | -38.1670 | -12.7500 |
| Coleodactylus meridionalis | -38.4489 | -12.9713 |
| Coleodactylus meridionalis | -38.4790 | -12.4113 |
| Coleodactylus meridionalis | -38.7500 | -8.5167  |
| Coleodactylus meridionalis | -38.8634 | -12.8591 |
| Coleodactylus meridionalis | -38.9172 | -4.2303  |
| Coleodactylus meridionalis | -38.9330 | -15.6830 |
| Coleodactylus meridionalis | -38.9354 | -13.0445 |
| Coleodactylus meridionalis | -39.0160 | -14.9500 |
| Coleodactylus meridionalis | -39.0164 | -15.2814 |
| Coleodactylus meridionalis | -39.0330 | -14.2630 |
| Coleodactylus meridionalis | -39.0704 | -14.4152 |
| Coleodactylus meridionalis | -39.0839 | -13.3614 |
| Coleodactylus meridionalis | -39.0892 | -7.3491  |
| Coleodactylus meridionalis | -39.1552 | -14.0248 |
| Coleodactylus meridionalis | -39.2833 | -14.5833 |
| Coleodactylus meridionalis | -39.3927 | -12.9704 |
| Coleodactylus meridionalis | -39.4686 | -16.9723 |
| Coleodactylus meridionalis | -39.6140 | -13.9044 |
| Coleodactylus meridionalis | -39.7047 | -13.5806 |
| Coleodactylus meridionalis | -39.7240 | -7.5120  |
| Coleodactylus meridionalis | -40.4775 | -14.8387 |
| Coleodactylus meridionalis | -40.5207 | -11.3676 |
| Coleodactylus meridionalis | -41.0825 | -11.9212 |
| Coleodactylus meridionalis | -41.2085 | -11.5920 |
| Coleodactylus meridionalis | -41.3237 | -12.7646 |

|                                   |          |          |
|-----------------------------------|----------|----------|
| <i>Coleodactylus meridionalis</i> | -41.3500 | -9.4830  |
| <i>Coleodactylus meridionalis</i> | -41.3597 | -12.6019 |
| <i>Coleodactylus meridionalis</i> | -41.9045 | -11.3544 |
| <i>Coleodactylus meridionalis</i> | -42.1167 | -11.0333 |
| <i>Coleodactylus meridionalis</i> | -42.5670 | -4.7690  |
| <i>Coleodactylus meridionalis</i> | -42.8556 | -2.7576  |
| <i>Coleodactylus meridionalis</i> | -43.6562 | -10.7158 |
| <i>Coleodactylus meridionalis</i> | -44.9752 | -12.3265 |
| <i>Coleodactylus meridionalis</i> | -46.5360 | -7.3510  |
| <i>Coleodactylus meridionalis</i> | -47.3340 | -3.0740  |
| <i>Coleodactylus meridionalis</i> | -47.4360 | -6.7330  |
| <i>Coleodactylus meridionalis</i> | -47.4900 | -7.2860  |
| <i>Coleodactylus meridionalis</i> | -47.5300 | -6.6700  |
| <i>Coleodactylus meridionalis</i> | -48.0130 | -2.6220  |
| <i>Coleodactylus meridionalis</i> | -48.3867 | -9.7310  |
| <i>Colobodactylus taunayi</i>     | -46.9601 | -23.6745 |
| <i>Colobodactylus taunayi</i>     | -47.0200 | -23.9500 |
| <i>Colobodactylus taunayi</i>     | -47.0333 | -23.6833 |
| <i>Colobodactylus taunayi</i>     | -47.4831 | -23.9514 |
| <i>Colobodactylus taunayi</i>     | -47.6100 | -23.4200 |
| <i>Colobodactylus taunayi</i>     | -47.9500 | -25.0200 |
| <i>Colobodactylus taunayi</i>     | -48.3583 | -24.1883 |
| <i>Colobodactylus taunayi</i>     | -48.4022 | -24.6500 |
| <i>Colobodactylus taunayi</i>     | -48.5749 | -23.7513 |
| <i>Colobodactylus taunayi</i>     | -49.7994 | -23.9327 |
| <i>Dendropsophus elegans</i>      | -35.3140 | -7.5031  |
| <i>Dendropsophus elegans</i>      | -35.7932 | -8.7389  |
| <i>Dendropsophus elegans</i>      | -35.9667 | -8.2667  |
| <i>Dendropsophus elegans</i>      | -36.1761 | -10.1335 |
| <i>Dendropsophus elegans</i>      | -36.3503 | -9.7795  |
| <i>Dendropsophus elegans</i>      | -37.4253 | -10.6850 |
| <i>Dendropsophus elegans</i>      | -38.2999 | -12.5309 |
| <i>Dendropsophus elegans</i>      | -39.0232 | -14.9377 |
| <i>Dendropsophus elegans</i>      | -39.0365 | -14.8015 |
| <i>Dendropsophus elegans</i>      | -39.0676 | -13.3740 |
| <i>Dendropsophus elegans</i>      | -39.0929 | -16.5846 |
| <i>Dendropsophus elegans</i>      | -39.1505 | -13.7325 |
| <i>Dendropsophus elegans</i>      | -39.2308 | -17.3326 |
| <i>Dendropsophus elegans</i>      | -39.2914 | -14.5868 |
| <i>Dendropsophus elegans</i>      | -39.4086 | -14.3608 |
| <i>Dendropsophus elegans</i>      | -39.4123 | -15.2593 |

|                       |          |          |
|-----------------------|----------|----------|
| Dendropsophus elegans | -39.4882 | -15.1694 |
| Dendropsophus elegans | -39.5012 | -15.4145 |
| Dendropsophus elegans | -39.8417 | -18.3553 |
| Dendropsophus elegans | -39.9925 | -19.1098 |
| Dendropsophus elegans | -40.0715 | -19.3909 |
| Dendropsophus elegans | -40.0978 | -19.1969 |
| Dendropsophus elegans | -40.1184 | -19.0235 |
| Dendropsophus elegans | -40.1833 | -20.1025 |
| Dendropsophus elegans | -40.2743 | -19.8196 |
| Dendropsophus elegans | -40.4948 | -20.3893 |
| Dendropsophus elegans | -40.5219 | -20.2811 |
| Dendropsophus elegans | -40.6006 | -19.9361 |
| Dendropsophus elegans | -40.6592 | -20.3633 |
| Dendropsophus elegans | -41.3684 | -21.0664 |
| Dendropsophus elegans | -41.6667 | -20.5000 |
| Dendropsophus elegans | -42.1500 | -20.7166 |
| Dendropsophus elegans | -42.2796 | -20.7269 |
| Dendropsophus elegans | -42.4000 | -20.6000 |
| Dendropsophus elegans | -43.0398 | -22.6567 |
| Dendropsophus elegans | -43.1786 | -22.5050 |
| Dendropsophus elegans | -43.3131 | -22.7868 |
| Dendropsophus elegans | -43.4166 | -20.3779 |
| Dendropsophus elegans | -44.3284 | -22.9050 |
| Dendropsophus elegans | -45.0860 | -23.4340 |
| Dendropsophus elegans | -45.4598 | -22.9236 |
| Dendropsophus elegans | -45.7624 | -23.7571 |
| Dendropsophus elegans | -46.1394 | -23.8553 |
| Dendropsophus elegans | -46.6300 | -23.5400 |
| Dendropsophus elegans | -47.1733 | -24.2946 |
| Dendropsophus elegans | -47.5710 | -24.6975 |
| Dendropsophus elegans | -47.8840 | -24.7102 |
| Dendropsophus elegans | -47.9323 | -25.0244 |
| Dendropsophus elegans | -48.5900 | -24.5800 |
| Dendropsophus elegans | -48.7119 | -25.4286 |
| Dendropsophus elegans | -48.8317 | -25.4790 |
| Enyalius catenatus    | -35.3801 | -7.6047  |
| Enyalius catenatus    | -35.5167 | -8.7000  |
| Enyalius catenatus    | -35.9074 | -8.9817  |
| Enyalius catenatus    | -36.0340 | -8.9845  |
| Enyalius catenatus    | -38.0375 | -12.5035 |
| Enyalius catenatus    | -38.3778 | -12.3783 |

|                                  |          |          |
|----------------------------------|----------|----------|
| <i>Enyalius catenatus</i>        | -38.4042 | -12.7847 |
| <i>Enyalius catenatus</i>        | -39.0061 | -14.2844 |
| <i>Enyalius catenatus</i>        | -39.0073 | -13.1819 |
| <i>Enyalius catenatus</i>        | -39.0333 | -14.7833 |
| <i>Enyalius catenatus</i>        | -39.0639 | -15.1678 |
| <i>Enyalius catenatus</i>        | -39.0647 | -16.4500 |
| <i>Enyalius catenatus</i>        | -39.0667 | -14.4167 |
| <i>Enyalius catenatus</i>        | -39.1651 | -15.2225 |
| <i>Enyalius catenatus</i>        | -39.1674 | -13.3509 |
| <i>Enyalius catenatus</i>        | -39.1749 | -17.0485 |
| <i>Enyalius catenatus</i>        | -39.2667 | -14.5833 |
| <i>Enyalius catenatus</i>        | -39.2833 | -15.5500 |
| <i>Enyalius catenatus</i>        | -39.3500 | -15.0833 |
| <i>Enyalius catenatus</i>        | -39.4827 | -12.8999 |
| <i>Enyalius catenatus</i>        | -39.4974 | -15.1320 |
| <i>Enyalius catenatus</i>        | -39.5192 | -15.4445 |
| <i>Enyalius catenatus</i>        | -39.6342 | -13.0374 |
| <i>Enyalius catenatus</i>        | -39.6897 | -13.5686 |
| <i>Enyalius catenatus</i>        | -40.5196 | -11.3692 |
| <i>Enyalius catenatus</i>        | -40.5825 | -11.7617 |
| <i>Enyalius catenatus</i>        | -40.8383 | -11.5500 |
| <i>Enyalius catenatus</i>        | -41.3597 | -12.6019 |
| <i>Enyalius catenatus</i>        | -41.9823 | -20.4808 |
| <i>Gymnodactylus darwinii</i>    | -35.2000 | -7.7833  |
| <i>Gymnodactylus darwinii</i>    | -35.7333 | -9.6500  |
| <i>Gymnodactylus darwinii</i>    | -38.0000 | -12.5667 |
| <i>Gymnodactylus darwinii</i>    | -38.3000 | -12.5333 |
| <i>Gymnodactylus darwinii</i>    | -39.0333 | -14.7833 |
| <i>Gymnodactylus darwinii</i>    | -39.0500 | -16.4333 |
| <i>Gymnodactylus darwinii</i>    | -39.0667 | -15.2833 |
| <i>Gymnodactylus darwinii</i>    | -39.8167 | -19.6333 |
| <i>Gymnodactylus darwinii</i>    | -44.7500 | -23.3333 |
| <i>Gymnodactylus darwinii</i>    | -45.1500 | -23.5667 |
| <i>Gymnodactylus darwinii</i>    | -45.4000 | -23.7500 |
| <i>Heterodactylus imbricatus</i> | -40.5219 | -20.2811 |
| <i>Heterodactylus imbricatus</i> | -40.5219 | -20.2811 |
| <i>Heterodactylus imbricatus</i> | -41.4835 | -13.0519 |
| <i>Heterodactylus imbricatus</i> | -41.4835 | -13.0519 |
| <i>Heterodactylus imbricatus</i> | -43.4993 | -19.2082 |
| <i>Heterodactylus imbricatus</i> | -43.5500 | -19.2600 |
| <i>Heterodactylus imbricatus</i> | -43.5500 | -19.2600 |

|                           |          |          |
|---------------------------|----------|----------|
| Heterodactylus imbricatus | -46.5356 | -21.7933 |
| Heterodactylus imbricatus | -46.5356 | -21.7933 |
| Heterodactylus imbricatus | -47.1500 | -23.5667 |
| Heterodactylus imbricatus | -47.1500 | -23.5667 |
| Hypsiboas albomarginatus  | -35.0497 | -8.2368  |
| Hypsiboas albomarginatus  | -35.3167 | -7.5167  |
| Hypsiboas albomarginatus  | -35.8642 | -8.9822  |
| Hypsiboas albomarginatus  | -36.0250 | -8.3736  |
| Hypsiboas albomarginatus  | -38.1410 | -12.4738 |
| Hypsiboas albomarginatus  | -38.5167 | -12.9833 |
| Hypsiboas albomarginatus  | -39.0000 | -12.1689 |
| Hypsiboas albomarginatus  | -39.1533 | -16.7997 |
| Hypsiboas albomarginatus  | -39.1600 | -14.3634 |
| Hypsiboas albomarginatus  | -39.4728 | -13.7865 |
| Hypsiboas albomarginatus  | -39.4974 | -15.1320 |
| Hypsiboas albomarginatus  | -39.5192 | -15.4445 |
| Hypsiboas albomarginatus  | -39.6342 | -13.0374 |
| Hypsiboas albomarginatus  | -40.5307 | -19.9482 |
| Hypsiboas albomarginatus  | -40.6361 | -20.7967 |
| Hypsiboas albomarginatus  | -40.6901 | -20.2888 |
| Hypsiboas albomarginatus  | -41.3000 | -21.7500 |
| Hypsiboas albomarginatus  | -41.3265 | -21.0471 |
| Hypsiboas albomarginatus  | -41.7167 | -20.3167 |
| Hypsiboas albomarginatus  | -41.7225 | -17.7451 |
| Hypsiboas albomarginatus  | -42.6133 | -19.7056 |
| Hypsiboas albomarginatus  | -43.1132 | -22.6121 |
| Hypsiboas albomarginatus  | -43.4331 | -22.8775 |
| Hypsiboas albomarginatus  | -44.3263 | -22.9294 |
| Hypsiboas albomarginatus  | -45.0459 | -23.1546 |
| Hypsiboas albomarginatus  | -46.3167 | -23.5200 |
| Hypsiboas albomarginatus  | -46.5501 | -23.8122 |
| Hypsiboas albomarginatus  | -47.0240 | -23.9547 |
| Hypsiboas albomarginatus  | -47.1489 | -24.2997 |
| Hypsiboas albomarginatus  | -47.7160 | -24.8590 |
| Hypsiboas albomarginatus  | -48.0795 | -24.5336 |
| Hypsiboas albomarginatus  | -48.6163 | -27.1731 |
| Hypsiboas albomarginatus  | -49.2333 | -26.4333 |
| Hypsiboas faber           | -35.8448 | -8.7132  |
| Hypsiboas faber           | -36.2840 | -9.8096  |
| Hypsiboas faber           | -37.4217 | -10.6853 |
| Hypsiboas faber           | -39.1167 | -16.5542 |

|                        |          |          |
|------------------------|----------|----------|
| Hypsiboas faber        | -39.3800 | -12.9759 |
| Hypsiboas faber        | -39.4179 | -15.2353 |
| Hypsiboas faber        | -40.0716 | -19.1506 |
| Hypsiboas faber        | -40.5307 | -19.9482 |
| Hypsiboas faber        | -40.5787 | -14.9032 |
| Hypsiboas faber        | -41.3265 | -21.0471 |
| Hypsiboas faber        | -41.4835 | -13.0519 |
| Hypsiboas faber        | -41.7245 | -17.7434 |
| Hypsiboas faber        | -42.6133 | -19.7056 |
| Hypsiboas faber        | -43.1610 | -22.4017 |
| Hypsiboas faber        | -43.3316 | -20.3292 |
| Hypsiboas faber        | -44.1990 | -19.9471 |
| Hypsiboas faber        | -45.0459 | -23.1546 |
| Hypsiboas faber        | -45.8933 | -23.6508 |
| Hypsiboas faber        | -47.4378 | -23.7865 |
| Hypsiboas faber        | -48.5749 | -23.7513 |
| Hypsiboas faber        | -48.7869 | -22.1698 |
| Hypsiboas faber        | -48.8748 | -25.4334 |
| Hypsiboas faber        | -49.2333 | -26.4333 |
| Hypsiboas faber        | -49.4583 | -28.4918 |
| Hypsiboas faber        | -49.7840 | -23.8540 |
| Hypsiboas faber        | -50.9476 | -24.1343 |
| Hypsiboas faber        | -50.9806 | -29.6143 |
| Hypsiboas semilineatus | -39.1242 | -16.5350 |
| Hypsiboas semilineatus | -39.4179 | -15.2353 |
| Hypsiboas semilineatus | -39.6342 | -13.0374 |
| Hypsiboas semilineatus | -39.6433 | -13.9712 |
| Hypsiboas semilineatus | -40.0290 | -19.1517 |
| Hypsiboas semilineatus | -40.6325 | -19.8768 |
| Hypsiboas semilineatus | -41.6564 | -20.9836 |
| Hypsiboas semilineatus | -41.7225 | -17.7451 |
| Hypsiboas semilineatus | -41.9774 | -22.2952 |
| Hypsiboas semilineatus | -42.6133 | -19.7056 |
| Hypsiboas semilineatus | -43.3316 | -20.3292 |
| Hypsiboas semilineatus | -45.0459 | -23.1546 |
| Hypsiboas semilineatus | -45.9971 | -23.7934 |
| Hypsiboas semilineatus | -47.1489 | -24.2997 |
| Leposoma scincoides    | -39.0333 | -14.7833 |
| Leposoma scincoides    | -39.0667 | -16.4500 |
| Leposoma scincoides    | -39.1167 | -16.5333 |
| Leposoma scincoides    | -39.1350 | -14.3851 |

|                     |          |          |
|---------------------|----------|----------|
| Leposoma scincoides | -39.1713 | -14.7950 |
| Leposoma scincoides | -39.2667 | -14.7833 |
| Leposoma scincoides | -39.3433 | -15.1664 |
| Leposoma scincoides | -39.5200 | -15.4400 |
| Leposoma scincoides | -39.5250 | -16.1555 |
| Leposoma scincoides | -39.5339 | -15.9508 |
| Leposoma scincoides | -39.5436 | -15.3866 |
| Leposoma scincoides | -39.6535 | -15.3865 |
| Leposoma scincoides | -39.6550 | -15.1926 |
| Leposoma scincoides | -39.8803 | -19.6319 |
| Leposoma scincoides | -40.0667 | -19.1500 |
| Leposoma scincoides | -40.1513 | -19.2766 |
| Leposoma scincoides | -40.5167 | -11.3833 |
| Leposoma scincoides | -40.5200 | -19.9600 |
| Leposoma scincoides | -40.5787 | -14.8810 |
| Leposoma scincoides | -40.9695 | -16.3460 |
| Leposoma scincoides | -41.0117 | -16.3333 |
| Mabuya dorsivittata | -41.8006 | -20.3936 |
| Mabuya dorsivittata | -41.8650 | -20.4585 |
| Mabuya dorsivittata | -43.5315 | -19.2591 |
| Mabuya dorsivittata | -43.5907 | -19.2891 |
| Mabuya dorsivittata | -44.3928 | -22.7286 |
| Mabuya dorsivittata | -44.9416 | -23.0522 |
| Mabuya dorsivittata | -46.6474 | -23.6497 |
| Mabuya dorsivittata | -46.9150 | -23.4490 |
| Mabuya dorsivittata | -46.9601 | -23.6745 |
| Mabuya dorsivittata | -47.6064 | -23.4380 |
| Mabuya dorsivittata | -47.6284 | -23.4039 |
| Mabuya dorsivittata | -48.3583 | -24.1883 |
| Mabuya dorsivittata | -48.5749 | -23.7513 |
| Mabuya dorsivittata | -52.1727 | -21.9096 |
| Melanophryniscus    | -48.6911 | -25.6253 |
| Melanophryniscus    | -48.7194 | -24.8550 |
| Melanophryniscus    | -48.8208 | -25.1303 |
| Melanophryniscus    | -48.8358 | -25.2442 |
| Melanophryniscus    | -48.8586 | -25.6119 |
| Melanophryniscus    | -48.9319 | -26.7986 |
| Melanophryniscus    | -48.9897 | -26.1644 |
| Melanophryniscus    | -48.9964 | -26.0217 |
| Melanophryniscus    | -49.1786 | -26.1467 |
| Melanophryniscus    | -50.0044 | -25.2475 |

|                      |          |          |
|----------------------|----------|----------|
| Phyllomedusa complex | -37.3153 | -10.7578 |
| Phyllomedusa complex | -39.0636 | -14.7822 |
| Phyllomedusa complex | -39.2844 | -14.5931 |
| Phyllomedusa complex | -39.5087 | -15.4164 |
| Phyllomedusa complex | -39.5395 | -14.5734 |
| Phyllomedusa complex | -40.0722 | -19.3911 |
| Phyllomedusa complex | -40.2733 | -19.8203 |
| Phyllomedusa complex | -40.4308 | -13.4411 |
| Phyllomedusa complex | -42.9024 | -16.5909 |
| Phyllomedusa complex | -46.9439 | -23.2496 |
| Phyllomedusa complex | -47.6755 | -22.3472 |
| Phyllomedusa complex | -47.7164 | -23.8131 |
| Phyllomedusa complex | -47.8811 | -24.7150 |
| Phyllomedusa complex | -48.5928 | -23.7975 |
| Phyllomedusa complex | -48.6324 | -25.8694 |
| Phyllomedusa complex | -48.7003 | -24.5328 |
| Phyllomedusa complex | -48.7119 | -25.4286 |
| Phyllomedusa complex | -48.7430 | -24.3586 |
| Phyllomedusa complex | -48.7657 | -26.7222 |
| Phyllomedusa complex | -49.3786 | -26.2503 |
| Phyllomedusa complex | -49.4575 | -28.5156 |
| Phyllomedusa complex | -50.3933 | -22.5992 |
| Phyllomedusa complex | -50.7411 | -23.7275 |
| Phyllomedusa complex | -50.9494 | -24.2083 |
| Phyllomedusa complex | -51.2583 | -26.0784 |
| Phyllomedusa complex | -51.7719 | -27.4197 |
| Phyllomedusa complex | -52.4550 | -26.6314 |
| Phyllomedusa complex | -53.5653 | -30.1606 |
| Phyllomedusa complex | -53.6725 | -31.5581 |
| Phyllomedusa complex | -53.8069 | -29.6842 |
| Placosoma glabellum  | -42.9831 | -22.4331 |
| Placosoma glabellum  | -43.5284 | -19.2244 |
| Placosoma glabellum  | -44.3928 | -22.7286 |
| Placosoma glabellum  | -44.8333 | -23.3667 |
| Placosoma glabellum  | -45.3342 | -23.4200 |
| Placosoma glabellum  | -45.4167 | -23.8000 |
| Placosoma glabellum  | -45.8667 | -23.6333 |
| Placosoma glabellum  | -47.0333 | -23.6833 |
| Placosoma glabellum  | -47.0700 | -23.9272 |
| Placosoma glabellum  | -47.5500 | -24.7167 |
| Placosoma glabellum  | -47.7000 | -23.8167 |



|                      |          |          |
|----------------------|----------|----------|
| Placosoma glabellum  | -48.4022 | -24.6500 |
| Placosoma glabellum  | -48.5667 | -25.9000 |
| Placosoma glabellum  | -48.5833 | -24.5833 |
| Proceratophrys boiei | -40.6325 | -19.8768 |
| Proceratophrys boiei | -41.0027 | -20.6450 |
| Proceratophrys boiei | -41.4336 | -20.4272 |
| Proceratophrys boiei | -41.7495 | -19.7575 |
| Proceratophrys boiei | -41.8489 | -20.4192 |
| Proceratophrys boiei | -41.9872 | -19.9986 |
| Proceratophrys boiei | -42.0359 | -20.7815 |
| Proceratophrys boiei | -42.0359 | -22.0348 |
| Proceratophrys boiei | -42.1020 | -19.7118 |
| Proceratophrys boiei | -42.2237 | -21.0141 |
| Proceratophrys boiei | -42.5013 | -22.3194 |
| Proceratophrys boiei | -42.7286 | -22.5157 |
| Proceratophrys boiei | -42.8734 | -22.3135 |
| Proceratophrys boiei | -42.8858 | -20.7401 |
| Proceratophrys boiei | -43.1140 | -22.1239 |
| Proceratophrys boiei | -43.1610 | -22.4017 |
| Proceratophrys boiei | -43.2600 | -20.2600 |
| Proceratophrys boiei | -43.2896 | -21.6064 |
| Proceratophrys boiei | -43.2999 | -22.6314 |
| Proceratophrys boiei | -43.3216 | -19.8176 |
| Proceratophrys boiei | -43.4052 | -22.3657 |
| Proceratophrys boiei | -43.4081 | -20.0754 |
| Proceratophrys boiei | -43.4690 | -21.9856 |
| Proceratophrys boiei | -43.6103 | -20.3910 |
| Proceratophrys boiei | -43.6372 | -19.8678 |
| Proceratophrys boiei | -43.7183 | -19.4407 |
| Proceratophrys boiei | -43.8788 | -22.0409 |
| Proceratophrys boiei | -43.9597 | -19.9024 |
| Proceratophrys boiei | -44.1248 | -21.9467 |
| Proceratophrys boiei | -44.1548 | -21.1168 |
| Proceratophrys boiei | -44.1882 | -22.5062 |
| Proceratophrys boiei | -44.1990 | -19.9471 |
| Proceratophrys boiei | -44.4830 | -22.2158 |
| Proceratophrys boiei | -44.5836 | -22.4385 |
| Proceratophrys boiei | -44.8200 | -22.6200 |
| Proceratophrys boiei | -44.8222 | -21.2915 |
| Proceratophrys boiei | -45.0657 | -21.0779 |
| Proceratophrys boiei | -45.1800 | -23.1100 |

|                        |          |          |
|------------------------|----------|----------|
| Proceratophrys boiei   | -45.2322 | -22.7928 |
| Proceratophrys boiei   | -45.3777 | -22.0009 |
| Proceratophrys boiei   | -45.6300 | -22.7200 |
| Proceratophrys boiei   | -45.6875 | -23.3125 |
| Proceratophrys boiei   | -45.9665 | -21.3893 |
| Proceratophrys boiei   | -46.1100 | -22.4800 |
| Proceratophrys boiei   | -46.1872 | -23.5681 |
| Proceratophrys boiei   | -46.3023 | -23.0465 |
| Proceratophrys boiei   | -46.3045 | -22.6319 |
| Proceratophrys boiei   | -46.5863 | -23.1227 |
| Proceratophrys boiei   | -46.6000 | -23.3667 |
| Proceratophrys boiei   | -46.6220 | -20.7190 |
| Proceratophrys boiei   | -46.8137 | -23.0060 |
| Proceratophrys boiei   | -46.8509 | -23.6507 |
| Proceratophrys boiei   | -47.0118 | -23.4116 |
| Proceratophrys boiei   | -47.0437 | -22.8834 |
| Proceratophrys boiei   | -47.0625 | -23.9375 |
| Proceratophrys boiei   | -47.4375 | -23.6875 |
| Proceratophrys boiei   | -47.6289 | -23.4039 |
| Proceratophrys boiei   | -47.7280 | -23.8560 |
| Proceratophrys boiei   | -47.9667 | -25.1333 |
| Proceratophrys boiei   | -48.0300 | -24.3300 |
| Proceratophrys boiei   | -48.0531 | -24.7757 |
| Proceratophrys boiei   | -48.2895 | -24.0386 |
| Proceratophrys boiei   | -48.4679 | -22.8624 |
| Proceratophrys boiei   | -48.5458 | -24.5119 |
| Proceratophrys boiei   | -48.5749 | -23.7513 |
| Proceratophrys boiei   | -48.5837 | -25.5838 |
| Proceratophrys boiei   | -48.7687 | -25.8172 |
| Proceratophrys boiei   | -48.7775 | -24.2556 |
| Proceratophrys boiei   | -48.7869 | -22.1698 |
| Proceratophrys boiei   | -48.9632 | -26.2469 |
| Proceratophrys boiei   | -49.0543 | -25.4710 |
| Proceratophrys boiei   | -49.3275 | -26.4387 |
| Proceratophrys boiei   | -49.4550 | -28.3844 |
| Proceratophrys boiei   | -49.5337 | -27.0156 |
| Proceratophrys renalis | -35.1833 | -8.0167  |
| Proceratophrys renalis | -35.3667 | -7.6000  |
| Proceratophrys renalis | -35.8333 | -8.7167  |
| Proceratophrys renalis | -36.0167 | -8.3667  |
| Proceratophrys renalis | -36.4000 | -8.2000  |

|                        |          |          |
|------------------------|----------|----------|
| Proceratophrys renalis | -38.7167 | -3.8833  |
| Pyriglena complex      | -37.6480 | -11.6240 |
| Pyriglena complex      | -37.9710 | -12.2550 |
| Pyriglena complex      | -38.4080 | -12.4480 |
| Pyriglena complex      | -38.4610 | -12.5110 |
| Pyriglena complex      | -39.0980 | -13.0230 |
| Pyriglena complex      | -39.2830 | -16.5030 |
| Pyriglena complex      | -39.5330 | -16.7450 |
| Pyriglena complex      | -39.8720 | -16.1560 |
| Pyriglena complex      | -40.0410 | -16.0450 |
| Pyriglena complex      | -40.0690 | -16.4210 |
| Pyriglena complex      | -40.1160 | -19.0090 |
| Pyriglena complex      | -40.3490 | -14.5060 |
| Pyriglena complex      | -40.6070 | -12.6630 |
| Pyriglena complex      | -40.6130 | -19.9250 |
| Pyriglena complex      | -40.7030 | -16.2060 |
| Pyriglena complex      | -40.9390 | -12.6480 |
| Pyriglena complex      | -41.0030 | -16.4340 |
| Pyriglena complex      | -41.2150 | -11.9130 |
| Pyriglena complex      | -41.3630 | -12.4330 |
| Pyriglena complex      | -41.5390 | -12.9500 |
| Pyriglena complex      | -42.3020 | -22.0340 |
| Pyriglena complex      | -42.5020 | -17.0650 |
| Pyriglena complex      | -42.6620 | -22.0570 |
| Pyriglena complex      | -43.0100 | -22.5210 |
| Pyriglena complex      | -43.4140 | -19.9600 |
| Pyriglena complex      | -43.6780 | -19.8150 |
| Pyriglena complex      | -43.7640 | -20.4350 |
| Pyriglena complex      | -44.7260 | -22.4890 |
| Pyriglena complex      | -44.7830 | -21.2170 |
| Pyriglena complex      | -45.0700 | -23.4350 |
| Pyriglena complex      | -45.5560 | -20.2640 |
| Pyriglena complex      | -45.8670 | -23.6330 |
| Pyriglena complex      | -46.7430 | -23.9850 |
| Pyriglena complex      | -46.9830 | -23.7000 |
| Pyriglena complex      | -47.0870 | -23.9320 |
| Pyriglena complex      | -47.4190 | -23.7110 |
| Pyriglena complex      | -48.1000 | -20.6830 |
| Pyriglena complex      | -48.5670 | -23.7170 |
| Pyriglena complex      | -48.5950 | -24.5870 |
| Pyriglena complex      | -49.1310 | -25.3330 |

|                         |          |          |
|-------------------------|----------|----------|
| Pyriglena complex       | -50.0500 | -23.9670 |
| Pyriglena complex       | -50.6930 | -24.0560 |
| Pyriglena complex       | -52.2470 | -22.6990 |
| Pyriglena complex       | -54.4780 | -25.9340 |
| Pyriglena complex       | -55.5400 | -27.2500 |
| Pyriglena complex       | -55.7330 | -26.1170 |
| Rhinella crucifer group | -34.9478 | -7.8242  |
| Rhinella crucifer group | -39.1470 | -16.8002 |
| Rhinella crucifer group | -39.2897 | -14.5867 |
| Rhinella crucifer group | -39.3222 | -14.3384 |
| Rhinella crucifer group | -39.8170 | -19.5507 |
| Rhinella crucifer group | -40.3277 | -20.4186 |
| Rhinella crucifer group | -40.5400 | -19.9589 |
| Rhinella crucifer group | -41.0100 | -20.4733 |
| Rhinella crucifer group | -41.8537 | -20.4214 |
| Rhinella crucifer group | -42.9866 | -22.4491 |
| Rhinella crucifer group | -43.7123 | -22.7256 |
| Rhinella crucifer group | -44.2417 | -15.1225 |
| Rhinella crucifer group | -44.5945 | -23.0440 |
| Rhinella crucifer group | -44.8253 | -23.3646 |
| Rhinella crucifer group | -45.1216 | -23.3449 |
| Rhinella crucifer group | -45.2333 | -22.2500 |
| Rhinella crucifer group | -45.4097 | -23.6075 |
| Rhinella crucifer group | -45.7274 | -23.7021 |
| Rhinella crucifer group | -46.2998 | -23.8162 |
| Rhinella crucifer group | -46.6036 | -21.6774 |
| Rhinella crucifer group | -46.7456 | -23.9962 |
| Rhinella crucifer group | -46.9357 | -23.5955 |
| Rhinella crucifer group | -46.9669 | -23.2169 |
| Rhinella crucifer group | -47.2263 | -24.5661 |
| Rhinella crucifer group | -47.3277 | -23.7750 |
| Rhinella crucifer group | -47.5229 | -22.4119 |
| Rhinella crucifer group | -47.6290 | -21.6295 |
| Rhinella crucifer group | -47.8314 | -22.2367 |
| Rhinella crucifer group | -48.4647 | -24.2201 |
| Rhinella crucifer group | -48.5408 | -25.7856 |
| Rhinella crucifer group | -48.6218 | -27.0902 |
| Rhinella crucifer group | -49.0101 | -25.3107 |
| Rhinella crucifer group | -49.0217 | -27.6725 |
| Rhinella crucifer group | -49.0273 | -26.7443 |
| Rhinella crucifer group | -49.0916 | -22.2355 |

|                         |          |          |
|-------------------------|----------|----------|
| Rhinella crucifer group | -49.5175 | -28.4704 |
| Rhinella crucifer group | -50.0809 | -29.0332 |
| Rhinella crucifer group | -50.0989 | -25.5717 |
| Rhinella crucifer group | -51.0565 | -30.0709 |
| Rhinella crucifer group | -51.2625 | -29.1416 |
| Rhinella crucifer group | -51.6119 | -27.3436 |
| Rhinella crucifer group | -51.8122 | -30.8511 |
| Rhinella crucifer group | -52.1917 | -28.2783 |
| Rhinella crucifer group | -52.3013 | -22.6057 |
| Rhinella crucifer group | -52.4102 | -27.0386 |
| Rhinella crucifer group | -53.8431 | -29.7939 |
| Rhinella crucifer group | -54.9520 | -27.0888 |
| Vitreorana eurygnatha   | -39.5436 | -15.4199 |
| Vitreorana eurygnatha   | -40.9920 | -16.3491 |
| Vitreorana eurygnatha   | -41.8425 | -20.5750 |
| Vitreorana eurygnatha   | -41.9823 | -20.4808 |
| Vitreorana eurygnatha   | -43.6214 | -19.3333 |
| Vitreorana eurygnatha   | -44.4779 | -22.8864 |
| Vitreorana eurygnatha   | -44.5628 | -22.4958 |
| Vitreorana eurygnatha   | -44.7319 | -22.3728 |
| Vitreorana eurygnatha   | -45.4586 | -22.7006 |
| Vitreorana eurygnatha   | -45.5900 | -22.7300 |
| Vitreorana eurygnatha   | -45.8736 | -23.7564 |
| Vitreorana eurygnatha   | -46.5356 | -21.7933 |
| Vitreorana eurygnatha   | -46.5667 | -21.9167 |
| Vitreorana eurygnatha   | -46.6333 | -23.8667 |
| Vitreorana eurygnatha   | -47.0250 | -23.8682 |
| Vitreorana eurygnatha   | -53.2845 | -28.3709 |
| Vitreorana uranoscopa   | -39.5501 | -15.3803 |
| Vitreorana uranoscopa   | -41.7922 | -20.5894 |
| Vitreorana uranoscopa   | -41.8431 | -20.4086 |
| Vitreorana uranoscopa   | -43.1571 | -22.7730 |
| Vitreorana uranoscopa   | -43.2999 | -22.6314 |
| Vitreorana uranoscopa   | -43.8589 | -20.5314 |
| Vitreorana uranoscopa   | -43.8908 | -20.0694 |
| Vitreorana uranoscopa   | -44.0663 | -22.9320 |
| Vitreorana uranoscopa   | -44.4775 | -22.8861 |
| Vitreorana uranoscopa   | -44.5628 | -22.4958 |
| Vitreorana uranoscopa   | -45.3100 | -23.2217 |
| Vitreorana uranoscopa   | -45.4117 | -21.5656 |
| Vitreorana uranoscopa   | -45.4422 | -22.6808 |

|                       |          |          |
|-----------------------|----------|----------|
| Vitreorana uranoscopa | -45.9351 | -23.5869 |
| Vitreorana uranoscopa | -46.3117 | -23.7765 |
| Vitreorana uranoscopa | -46.6333 | -23.8667 |
| Vitreorana uranoscopa | -46.6474 | -23.6497 |
| Vitreorana uranoscopa | -46.8348 | -24.0907 |
| Vitreorana uranoscopa | -46.9971 | -23.8795 |
| Vitreorana uranoscopa | -47.4086 | -23.7167 |
| Vitreorana uranoscopa | -47.9667 | -25.1336 |
| Vitreorana uranoscopa | -48.5914 | -24.5850 |
| Vitreorana uranoscopa | -49.3831 | -26.3119 |
| Vitreorana uranoscopa | -49.5033 | -28.4992 |
| Vitreorana uranoscopa | -49.5364 | -28.5628 |
| Vitreorana uranoscopa | -49.7994 | -23.9327 |
| Vitreorana uranoscopa | -51.0874 | -24.1581 |
| Vitreorana uranoscopa | -51.2414 | -27.3772 |
| Vitreorana uranoscopa | -52.0222 | -25.5131 |
| Vitreorana uranoscopa | -52.4147 | -26.8667 |
| Vitreorana uranoscopa | -52.4489 | -27.0689 |
| Vitreorana uranoscopa | -52.5569 | -26.5642 |
| Xiphorhynchus fuscus  | -35.8667 | -8.9833  |
| Xiphorhynchus fuscus  | -38.9167 | -4.2958  |
| Xiphorhynchus fuscus  | -38.9333 | -4.2333  |
| Xiphorhynchus fuscus  | -39.9167 | -19.0500 |
| Xiphorhynchus fuscus  | -40.0333 | -16.0833 |
| Xiphorhynchus fuscus  | -40.2833 | -17.3667 |
| Xiphorhynchus fuscus  | -40.5667 | -19.9333 |
| Xiphorhynchus fuscus  | -41.0000 | -16.3330 |
| Xiphorhynchus fuscus  | -41.2000 | -11.9000 |
| Xiphorhynchus fuscus  | -41.3500 | -12.4167 |
| Xiphorhynchus fuscus  | -42.0833 | -20.8333 |
| Xiphorhynchus fuscus  | -42.5500 | -22.0000 |
| Xiphorhynchus fuscus  | -43.8167 | -19.9833 |
| Xiphorhynchus fuscus  | -44.3167 | -22.6833 |
| Xiphorhynchus fuscus  | -44.6333 | -22.4000 |
| Xiphorhynchus fuscus  | -46.9833 | -23.7000 |
| Xiphorhynchus fuscus  | -47.1500 | -23.5667 |
| Xiphorhynchus fuscus  | -48.2167 | -22.6333 |
| Xiphorhynchus fuscus  | -49.0333 | -27.6833 |
| Xiphorhynchus fuscus  | -49.7833 | -22.8500 |
| Xiphorhynchus fuscus  | -52.3000 | -22.5000 |
| Xiphorhynchus fuscus  | -55.6500 | -27.3660 |
